# Supplementary material for: Prediction of Protein−compound Binding Energies from Known Activity Data: Docking‐score‐based Method and its Applications
Source: PubMed Central journal article supplement (PMC6055825; doi:10.1002/minf.201700120), 2018-02-14
Supplement: MINF-37-na-s001.pdf [file MINF-37-na-s001.pdf]

## Supporting Information

### Prediction of protein–compound binding energies from known activity data: docking-score-based method and its applications

Yoshifumi Fukunishi,<sup>[a]</sup> Yasunobu Yamashita,<sup>[b]</sup> Tadaaki Mashimo,<sup>[b,c]</sup> and Haruki Nakamura<sup>[d]</sup>

[a] Molecular Profiling Research Center for Drug Discovery (molprof), National Institute of Advanced Industrial Science and Technology (AIST), 2-3-26, Aomi, Koto-ku, Tokyo 135-0064, Japan

[b] Technology Research Association for Next-Generation Natural Products Chemistry, 2-3-26, Aomi, Koto-ku, Tokyo 135-0064, Japan

[c] IMSBIO Co., Ltd., Owl Tower, 4-21-1, Higashi-Ikebukuro, Toshima-ku, Tokyo 170-0013, Japan.

[d] Institute for Protein Research, Osaka University, 3-2 Yamadaoka, Suita, Osaka 565-0871, Japan

\*e-mail: y-fukunishi@aist.go.jp, phone/fax: +81-3-3599-8290/+81-3-3599-8099

\*e-mail: y-fukunishi@aist.go.jp; phone/fax: +81-3-3599-8290/+81-3-3599-8099

## APPENDIX A

The selected 600 proteins were as follows: 10gs, 13gs, 17gs, 19gs, 1a0l, 1a27, 1a3k, 1a5h, 1aax, 1ad5, 1ae8, 1afe, 1agw, 1aht, 1aq1, 1aqw, 1aqx, 1atk, 1au0, 1au2, 1au3, 1au4, 1avn, 1awf, 1awh, 1axs, 1ayu, 1ayv, 1ayw, 1b09, 1b2y, 1b38, 1b39, 1b3d, 1b55, 1bhx, 1bic, 1bik, 1bio, 1biw, 1bj4, 1bkf, 1bl4, 1bl6, 1bl7, 1bmk, 1bmq, 1bpy, 1bui, 1bwn, 1byg, 1bzc, 1bjz, 1bzm, 1bzs, 1bzy, 1c1u, 1c1v, 1c1y, 1c4u, 1c4y, 1c5c, 1c5o, 1c5w, 1c5x, 1c5y, 1c8t, 1c9h, 1c9y, 1ca8, 1cam, 1can, 1caq, 1cay, 1caz, 1cbq, 1cbs, 1cc0, 1cd9, 1cea, 1ceb, 1ciz, 1ckp, 1cqp, 1ctr, 1d4p, 1d4x, 1d5j, 1d5m, 1d6v, 1d7h, 1d7i, 1d7j, 1d7x, 1d8f, 1db1, 1db4, 1db5, 1dcy, 1dhf, 1dhs, 1di8, 1di9, 1doa, 1doj, 1drf, 1dtw, 1dvs, 1dvt, 1dvu, 1dvx, 1dvy, 1dvz, 1dwb, 1dwc, 1dwd, 1e1v, 1e1x, 1e1z, 1e2d, 1e2q, 1e2s, 1e3c, 1e3k, 1e4h, 1e51, 1e5a, 1e7a, 1e7b, 1e7c, 1e7e, 1e7f, 1e7g, 1e7h, 1e7i, 1e87, 1e96, 1e9h, 1eax, 1ejn, 1ek5, 1ekf, 1ekp, 1ekv, 1emu, 1eou, 1ep9, 1equ, 1ere, 1err, 1exa, 1exx, 1f0r, 1f2w, 1f45, 1f5f, 1f5n, 1f9p, 1fak, 1fao, 1fby, 1fcx, 1fcy, 1fcz, 1fd0, 1fds, 1fdt, 1fdw, 1fgi, 1fhi, 1fin, 1fjs, 1fkb, 1fkd, 1fkf, 1fkg, 1fkh, 1fki, 1fkj, 1fls, 1fpc, 1fq1, 1fuj, 1fvo, 1fzc, 1fze, 1fzf, 1fzg, 1fzv, 1g05, 1g2l, 1g2m, 1g30, 1g32, 1g3m, 1g49, 1g4k, 1g5s, 1g7f, 1g7g, 1g86, 1g9n, 1gbn, 1gc1, 1gcq, 1gfw, 1gkc, 1gkd, 1gmh, 1gmo, 1gni,



## APPENDIX B

The ChEMBL database records the affinity data ( $IC_{50}$ , %-inhibition, %-residual activity, etc.) without experimental detail parameters, which are the densities of inhibitors and ligands. We must check the references to determine these parameters, or we must use standard values instead of the actual experimental values. In the present study, we used the standard values for the densities of the inhibitors and ligands. The protein–compound binding energy  $\Delta G$  is calculated from the  $K_d$  value as follows:

$$\Delta G = k_B \cdot T \cdot \ln(K_d), \quad \text{eq. S1}$$

where  $k_B$  and  $T$  are the Boltzmann constant and temperature, respectively. In the present study, we assumed that  $K_d = K_i$ , since the binding affinities of the natural ligands have been reported to be much weaker than those of the reported artificial ligands in many proteins. In addition, the %-inhibition value ( $r$ ) gives the  $K_i$  values as follows in the present study.

$$K_i = \frac{[I]}{\frac{[S]/(1-r) - [S]}{K_s} - 1} \quad \text{eq. S2}$$

Here  $K_s$ ,  $[S]$ , and  $[I]$  are the rate constant, the density of the inhibitor, and the density of the substrate, respectively. The  $IC_{50}$  value is converted to the  $K_i$  value by the Cheng–Prusoff equation as follows.<sup>[32, 49]</sup>

$$K_i = \frac{IC_{50}}{1 + \frac{[S]}{K_s}} \quad \text{eq. S3}$$

As shown above, the  $\Delta G$  value depends on the densities of the inhibitor, substrate, and  $K_s$ . The ChEMBL database does not provide these parameters explicitly. Instead of the true parameters described in each original experimental article, we used the same set of standard values for these parameters that we used in our previous work. Namely,  $[I] = 50 \mu\text{M}$ ,  $[S] = 20 \mu\text{M}$ , and  $K_s = 1 \mu\text{M}$  in both eqs. S2 and S3, and  $[S]/K_s = 1$  in eq. S3.

Assay data with inadequate energy units or unclear energy values were excluded. The assay data for large compounds (mass weight > 500 Da) and very small compounds (mass weight < 150 Da) were also excluded, since SievGene is designed for the docking of small compounds with mass weights > 150 Da and mass weights < 500 Da. In addition, we avoided the chemical compound structures that were not consistent with the same compounds registered in the PubChem database.

**Table S1** Correlation ( $R^2/Q^2$ ) between the experimental data and the calculated data obtained by the LOO cross validation test of the docking-score QSAR model over all 107 proteins.

| Preferred name                                               | No of ligands | $R^2$ <sup>a</sup> | RMSEC (kcal/mol) <sup>b</sup> | $Q^2$ <sup>c</sup> | RMSEP (kcal/mol) <sup>d</sup> |
|--------------------------------------------------------------|---------------|--------------------|-------------------------------|--------------------|-------------------------------|
| Tyrosine-protein kinase ABL1                                 | 795           | 0.67               | 0.96                          | 0.57               | 1.11                          |
| Tyrosine-protein kinase ABL2                                 | 126           | 0.97               | 0.32                          | 0.92               | 0.49                          |
| Serine/threonine-protein kinase AKT                          | 833           | 0.74               | 1.50                          | 0.67               | 1.70                          |
| Serine/threonine-protein kinase AKT2                         | 286           | 0.94               | 0.73                          | 0.86               | 1.12                          |
| Serine/threonine-protein kinase AKT3                         | 102           | 0.96               | 0.41                          | 0.92               | 0.62                          |
| ALK tyrosine kinase receptor                                 | 66            | 0.90               | 0.69                          | 0.64               | 1.46                          |
| Serine/threonine-protein kinase Aurora-A                     | 531           | 0.76               | 0.85                          | 0.62               | 1.09                          |
| Serine/threonine-protein kinase Aurora-B                     | 321           | 0.88               | 0.69                          | 0.71               | 1.08                          |
| Serine/threonine-protein kinase Aurora-C                     | 98            | 0.96               | 0.42                          | 0.86               | 0.76                          |
| Serine/threonine-protein kinase B-raf                        | 229           | 0.92               | 0.60                          | 0.79               | 0.99                          |
| Cell division cycle 7-related protein kinase                 | 185           | 0.97               | 0.22                          | 0.81               | 0.55                          |
| Cyclin-dependent kinase 1                                    | 1582          | 0.47               | 1.41                          | 0.32               | 1.60                          |
| Cyclin-dependent kinase 2                                    | 2223          | 0.40               | 1.65                          | 0.25               | 1.86                          |
| Cyclin-dependent kinase 4                                    | 1261          | 0.61               | 1.10                          | 0.48               | 1.26                          |
| Cyclin-dependent kinase 5                                    | 599           | 0.69               | 1.14                          | 0.56               | 1.37                          |
| Cyclin-dependent kinase 9                                    | 86            | 0.91               | 0.49                          | 0.77               | 0.82                          |
| Inhibitor of nuclear factor kappa B kinase alpha subunit     | 255           | 0.83               | 0.55                          | 0.60               | 0.86                          |
| Dual specificity protein kinase CLK4                         | 72            | 0.96               | 0.29                          | 0.86               | 0.54                          |
| Macrophage colony stimulating factor receptor                | 420           | 0.73               | 1.04                          | 0.59               | 1.30                          |
| Tyrosine-protein kinase CSK                                  | 130           | 0.86               | 0.69                          | 0.57               | 1.24                          |
| Serine/threonine-protein kinase Chk1                         | 928           | 0.63               | 1.53                          | 0.55               | 1.70                          |
| Serine/threonine-protein kinase Chk2                         | 211           | 0.92               | 0.73                          | 0.77               | 1.32                          |
| Dual-specificity tyrosine-phosphorylation regulated kinase 2 | 69            | 0.97               | 0.31                          | 0.88               | 0.64                          |
| Dual-specificity tyrosine-phosphorylation regulated kinase 3 | 57            | 0.99               | 0.19                          | 0.83               | 0.67                          |
| Epidermal growth factor receptor erbB1                       | 3181          | 1.00               | 1.00                          | 0.30               | 2.01                          |
| MAP kinase ERK2                                              | 296           | 0.91               | 0.76                          | 0.78               | 1.17                          |
| MAP kinase ERK1                                              | 218           | 0.94               | 0.60                          | 0.81               | 1.08                          |
| Mitogen-activated protein kinase 15                          | 73            | 0.98               | 0.20                          | 0.86               | 0.59                          |
| Focal adhesion kinase 1                                      | 157           | 0.98               | 0.22                          | 0.87               | 0.51                          |
| Fibroblast growth factor receptor 1                          | 548           | 0.76               | 0.81                          | 0.63               | 1.03                          |
| Fibroblast growth factor receptor 2                          | 116           | 0.98               | 0.27                          | 0.89               | 0.65                          |
| Fibroblast growth factor receptor 3                          | 103           | 0.97               | 0.35                          | 0.93               | 0.50                          |
| Fibroblast growth factor receptor 4                          | 76            | 1.00               | 0.12                          | 0.93               | 0.58                          |
| Tyrosine-protein kinase receptor FLT3                        | 423           | 0.86               | 0.69                          | 0.74               | 0.94                          |
| Glycogen synthase kinase-3 alpha                             | 103           | 0.94               | 0.52                          | 0.88               | 0.74                          |
| Glycogen synthase kinase-3 alpha                             | 465           | 0.84               | 0.91                          | 0.72               | 1.22                          |

|                                                             |      |      |      |      |      |
|-------------------------------------------------------------|------|------|------|------|------|
| Glycogen synthase kinase-3 beta                             | 1522 | 0.50 | 1.58 | 0.38 | 1.76 |
| Tyrosine-protein kinase HCK                                 | 208  | 0.94 | 0.42 | 0.82 | 0.73 |
| Receptor protein-tyrosine kinase erbB-2                     | 707  | 0.69 | 1.02 | 0.58 | 1.20 |
| Homeodomain-interacting protein kinase 2                    | 64   | 0.96 | 0.36 | 0.84 | 0.73 |
| Homeodomain interacting protein kinase 3                    | 61   | 0.99 | 0.15 | 0.83 | 0.83 |
| Insulin-like growth factor I receptor                       | 284  | 0.88 | 0.73 | 0.70 | 1.17 |
| Inhibitor of nuclear factor kappa B kinase beta subunit     | 468  | 0.79 | 0.99 | 0.65 | 1.31 |
| Insulin receptor                                            | 182  | 0.96 | 0.42 | 0.86 | 0.83 |
| Interleukin-1 receptor-associated kinase 4                  | 128  | 1.00 | 0.09 | 0.94 | 0.50 |
| Tyrosine-protein kinase ITK/TSK                             | 241  | 0.74 | 0.86 | 0.49 | 1.23 |
| c-Jun N-terminal kinase 1                                   | 619  | 0.76 | 1.32 | 0.65 | 1.58 |
| c-Jun N-terminal kinase 2                                   | 311  | 0.89 | 0.88 | 0.76 | 1.35 |
| c-Jun N-terminal kinase 3                                   | 589  | 0.68 | 1.16 | 0.54 | 1.42 |
| Stem cell growth factor receptor                            | 615  | 0.78 | 0.84 | 0.68 | 1.03 |
| Tyrosine-protein kinase LCK                                 | 1396 | 0.58 | 1.67 | 0.47 | 1.88 |
| LIM domain kinase 2 isoform 2b                              | 51   | 1.00 | 0.14 | 0.88 | 0.81 |
| Tyrosine-protein kinase Lyn                                 | 185  | 0.79 | 1.35 | 0.52 | 2.11 |
| MAP/microtubule affinity-regulating kinase 3                | 69   | 0.98 | 0.26 | 0.88 | 0.62 |
| Dual specificity mitogen-activated protein kinase kinase 1  | 542  | 0.76 | 1.35 | 0.63 | 1.68 |
| Maternal embryonic leucine zipper kinase                    | 69   | 0.90 | 0.39 | 0.65 | 0.76 |
| Hepatocyte growth factor receptor                           | 325  | 0.88 | 0.80 | 0.72 | 1.23 |
| MAP kinase-activated protein kinase 2                       | 412  | 0.84 | 1.01 | 0.73 | 1.34 |
| MAP kinase-interacting serine/threonine-protein kinase MNK1 | 89   | 0.96 | 0.41 | 0.82 | 0.87 |
| Ribosomal protein S6 kinase alpha 5                         | 89   | 0.98 | 0.32 | 0.83 | 0.86 |
| Myosin light chain kinase, smooth muscle                    | 123  | 0.94 | 0.52 | 0.87 | 0.80 |
| NIMA (never in mitosis gene a)-related kinase 2             | 71   | 0.97 | 0.25 | 0.87 | 0.53 |
| putative serine-threonine protein kinase                    | 63   | 0.96 | 0.26 | 0.82 | 0.55 |
| NIMA (never in mitosis gene a)-related kinase 7             | 62   | 0.99 | 0.14 | 0.92 | 0.38 |
| Neurotrophic tyrosine kinase, receptor, type 1 isoform 1    | 130  | 0.63 | 1.43 | 0.26 | 2.04 |
| Nerve growth factor receptor Trk-A                          | 79   | 0.95 | 0.42 | 0.76 | 0.94 |
| p21-activated kinase 6                                      | 68   | 0.98 | 0.28 | 0.87 | 0.73 |
| Serine/threonine-protein kinase PAK7                        | 71   | 0.99 | 0.17 | 0.94 | 0.41 |
| Platelet-derived growth factor receptor alpha               | 433  | 0.75 | 1.00 | 0.58 | 1.34 |
| Platelet-derived growth factor receptor beta                | 775  | 0.59 | 1.22 | 0.47 | 1.39 |
| Phosphorylase kinase gamma subunit 1                        | 104  | 0.98 | 0.34 | 0.94 | 0.62 |
| Phosphorylase kinase gamma subunit 2                        | 103  | 0.99 | 0.31 | 0.93 | 0.72 |
| Serine/threonine-protein kinase PIM1                        | 462  | 0.72 | 1.29 | 0.58 | 1.61 |
| Serine/threonine-protein kinase PIM2                        | 233  | 0.93 | 0.61 | 0.77 | 1.18 |
| Serine/threonine-protein kinase PIM3                        | 120  | 0.89 | 0.69 | 0.68 | 1.22 |
| cAMP-dependent protein kinase alpha-catalytic subunit       | 383  | 0.86 | 0.93 | 0.76 | 1.27 |

|                                                        |      |      |      |      |      |
|--------------------------------------------------------|------|------|------|------|------|
| cAMP-dependent protein kinase beta-1 catalytic subunit | 308  | 0.89 | 0.88 | 0.77 | 1.32 |
| cAMP-dependent protein kinase, gamma catalytic subunit | 303  | 0.90 | 0.84 | 0.79 | 1.27 |
| Protein kinase C alpha                                 | 669  | 0.71 | 1.26 | 0.61 | 1.49 |
| Protein kinase C beta                                  | 441  | 0.83 | 0.82 | 0.71 | 1.06 |
| Protein kinase C delta                                 | 273  | 0.90 | 0.67 | 0.79 | 1.01 |
| Protein kinase C gamma                                 | 255  | 0.92 | 0.61 | 0.80 | 0.98 |
| Protein kinase C eta                                   | 220  | 0.90 | 0.71 | 0.76 | 1.16 |
| Protein kinase C iota                                  | 195  | 0.94 | 0.51 | 0.84 | 0.86 |
| Protein kinase C theta                                 | 444  | 0.80 | 0.94 | 0.67 | 1.23 |
| Protein kinase C zeta                                  | 218  | 0.89 | 0.84 | 0.74 | 1.28 |
| Protein kinase C mu                                    | 213  | 0.91 | 0.75 | 0.79 | 1.18 |
| Protein kinase C nu                                    | 147  | 0.94 | 0.54 | 0.86 | 0.82 |
| Protein kinase N2                                      | 84   | 0.99 | 0.21 | 0.91 | 0.59 |
| Serine/threonine-protein kinase PLK1                   | 271  | 0.92 | 0.74 | 0.78 | 1.26 |
| Serine/threonine-protein kinase RAF                    | 501  | 0.80 | 1.11 | 0.68 | 1.40 |
| Tyrosine-protein kinase receptor RET                   | 91   | 0.92 | 0.44 | 0.78 | 0.72 |
| Serine/threonine-protein kinase Sgk1                   | 106  | 0.96 | 0.40 | 0.84 | 0.78 |
| Tyrosine-protein kinase SRC                            | 1740 | 0.53 | 1.47 | 0.36 | 1.72 |
| Serine/threonine-protein kinase SRPK1                  | 75   | 0.94 | 0.39 | 0.78 | 0.78 |
| Serine/threonine-protein kinase MST1                   | 85   | 0.98 | 0.26 | 0.85 | 0.79 |
| Tyrosine-protein kinase SYK                            | 311  | 0.87 | 0.65 | 0.72 | 0.98 |
| Tyrosine-protein kinase TIE-2                          | 540  | 0.80 | 0.78 | 0.68 | 1.00 |
| Vascular endothelial growth factor receptor 1          | 539  | 0.72 | 0.80 | 0.57 | 0.99 |
| Vascular endothelial growth factor receptor 2          | 3200 | 1.00 | 1.00 | 0.19 | 1.64 |
| Vascular endothelial growth factor receptor 3          | 122  | 0.92 | 0.50 | 0.83 | 0.75 |
| Serine/threonine-protein kinase WEE1                   | 483  | 0.94 | 0.29 | 0.90 | 0.40 |
| Tyrosine-protein kinase ZAP-70                         | 68   | 0.99 | 0.27 | 0.94 | 0.63 |
| MAP kinase p38 alpha                                   | 2647 | 1.00 | 1.00 | 0.26 | 1.81 |
| MAP kinase p38 beta                                    | 553  | 0.75 | 1.20 | 0.62 | 1.49 |
| MAP kinase p38 delta                                   | 403  | 0.81 | 1.06 | 0.66 | 1.43 |
| MAP kinase p38 gamma                                   | 428  | 0.81 | 1.11 | 0.69 | 1.44 |

<sup>a</sup>: Coefficient of determination of calculation

<sup>b</sup>: RMSE in calculation

<sup>c</sup>: Coefficient of determination of prediction

<sup>d</sup>: RMSE in prediction

**Table S2** Correlation ( $R^2/Q^2$ ) between the experimental data and the calculated data obtained by the 4-fold cross validation test of the docking-score QSAR model over all 107 proteins.

| Preferred name                                               | 4-fold cross validation |                               |                    |                               |
|--------------------------------------------------------------|-------------------------|-------------------------------|--------------------|-------------------------------|
|                                                              | $R^2$ <sup>a</sup>      | RMSEC (kcal/mol) <sup>b</sup> | $Q^2$ <sup>c</sup> | RMSEP (kcal/mol) <sup>d</sup> |
| Tyrosine-protein kinase ABL1                                 | 0.68                    | 0.92                          | 0.54               | 1.11                          |
| Tyrosine-protein kinase ABL2                                 | 1.00                    | 0.06                          | 0.74               | 0.91                          |
| Serine/threonine-protein kinase AKT                          | 0.76                    | 1.50                          | 0.66               | 1.76                          |
| Serine/threonine-protein kinase AKT2                         | 0.95                    | 0.66                          | 0.84               | 1.19                          |
| Serine/threonine-protein kinase AKT3                         | 1.00                    | 0.05                          | 0.87               | 0.78                          |
| ALK tyrosine kinase receptor                                 | 1.00                    | 0.03                          | 0.62               | 1.57                          |
| Serine/threonine-protein kinase Aurora-A                     | 0.77                    | 0.81                          | 0.62               | 1.05                          |
| Serine/threonine-protein kinase Aurora-B                     | 0.92                    | 0.53                          | 0.77               | 0.91                          |
| Serine/threonine-protein kinase Aurora-C                     | 1.00                    | 0.06                          | 0.76               | 1.06                          |
| Serine/threonine-protein kinase B-raf                        | 0.98                    | 0.34                          | 0.85               | 0.86                          |
| Cell division cycle 7-related protein kinase                 | 0.99                    | 0.13                          | 0.76               | 0.46                          |
| Cyclin-dependent kinase 1                                    | 0.50                    | 1.37                          | 0.42               | 1.47                          |
| Cyclin-dependent kinase 2                                    | 1.00                    | 1.00                          | 0.26               | 1.86                          |
| Cyclin-dependent kinase 4                                    | 0.62                    | 1.07                          | 0.54               | 1.17                          |
| Cyclin-dependent kinase 5                                    | 0.64                    | 1.21                          | 0.47               | 1.46                          |
| Cyclin-dependent kinase 9                                    | 0.99                    | 0.21                          | 0.81               | 0.74                          |
| Inhibitor of nuclear factor kappa B kinase alpha subunit     | 0.93                    | 0.34                          | 0.71               | 0.68                          |
| Dual specificity protein kinase CLK4                         | 1.00                    | 0.01                          | 0.74               | 0.73                          |
| Macrophage colony stimulating factor receptor                | 0.85                    | 0.75                          | 0.68               | 1.10                          |
| Tyrosine-protein kinase CSK                                  | 1.00                    | 0.05                          | 0.79               | 0.86                          |
| Serine/threonine-protein kinase Chk1                         | 0.65                    | 1.52                          | 0.57               | 1.68                          |
| Serine/threonine-protein kinase Chk2                         | 0.97                    | 0.48                          | 0.79               | 1.22                          |
| Dual-specificity tyrosine-phosphorylation regulated kinase 2 | 1.00                    | 0.03                          | 0.65               | 1.03                          |
| Dual-specificity tyrosine-phosphorylation regulated kinase 3 | 1.00                    | 0.02                          | 0.82               | 0.64                          |
| Epidermal growth factor receptor erbB1                       | 1.00                    | 1.00                          | 0.27               | 1.97                          |
| MAP kinase ERK2                                              | 0.92                    | 0.73                          | 0.80               | 1.10                          |
| MAP kinase ERK1                                              | 0.98                    | 0.38                          | 0.86               | 0.91                          |
| Mitogen-activated protein kinase 15                          | 1.00                    | 0.04                          | 0.50               | 1.23                          |
| Focal adhesion kinase 1                                      | 0.99                    | 0.10                          | 0.84               | 0.56                          |
| Fibroblast growth factor receptor 1                          | 0.78                    | 0.78                          | 0.61               | 1.03                          |
| Fibroblast growth factor receptor 2                          | 1.00                    | 0.08                          | 0.76               | 0.99                          |
| Fibroblast growth factor receptor 3                          | 1.00                    | 0.09                          | 0.79               | 0.93                          |
| Fibroblast growth factor receptor 4                          | 1.00                    | 0.04                          | 0.81               | 0.96                          |
| Tyrosine-protein kinase receptor FLT3                        | 0.89                    | 0.61                          | 0.73               | 0.94                          |
| Glycogen synthase kinase-3 alpha                             | 0.99                    | 0.16                          | 0.61               | 1.32                          |
| Glycogen synthase kinase-3 alpha                             | 0.82                    | 0.96                          | 0.68               | 1.31                          |
| Glycogen synthase kinase-3 beta                              | 0.53                    | 1.55                          | 0.44               | 1.69                          |
| Tyrosine-protein kinase HCK                                  | 0.96                    | 0.33                          | 0.78               | 0.76                          |

|                                                             |      |      |      |      |
|-------------------------------------------------------------|------|------|------|------|
| Receptor protein-tyrosine kinase erbB-2                     | 0.72 | 0.96 | 0.58 | 1.19 |
| Homeodomain-interacting protein kinase 2                    | 1.00 | 0.05 | 0.59 | 1.28 |
| Homeodomain interacting protein kinase 3                    | 1.00 | 0.04 | 0.68 | 1.02 |
| Insulin-like growth factor I receptor                       | 0.98 | 0.26 | 0.81 | 0.89 |
| Inhibitor of nuclear factor kappa B kinase beta subunit     | 0.82 | 0.92 | 0.68 | 1.24 |
| Insulin receptor                                            | 0.98 | 0.28 | 0.79 | 1.04 |
| Interleukin-1 receptor-associated kinase 4                  | 1.00 | 0.12 | 0.82 | 0.87 |
| Tyrosine-protein kinase ITK/TSK                             | 0.99 | 0.15 | 0.74 | 0.90 |
| c-Jun N-terminal kinase 1                                   | 0.77 | 1.28 | 0.65 | 1.60 |
| c-Jun N-terminal kinase 2                                   | 0.93 | 0.73 | 0.79 | 1.27 |
| c-Jun N-terminal kinase 3                                   | 0.66 | 1.18 | 0.48 | 1.45 |
| Stem cell growth factor receptor                            | 0.79 | 0.83 | 0.63 | 1.11 |
| Tyrosine-protein kinase LCK                                 | 0.64 | 1.55 | 0.58 | 1.67 |
| LIM domain kinase 2 isoform 2b                              | 1.00 | 0.01 | 0.80 | 1.04 |
| Tyrosine-protein kinase Lyn                                 | 0.99 | 0.23 | 0.81 | 1.25 |
| MAP/microtubule affinity-regulating kinase 3                | 1.00 | 0.05 | 0.65 | 1.09 |
| Dual specificity mitogen-activated protein kinase kinase 1  | 0.76 | 1.38 | 0.61 | 1.76 |
| Maternal embryonic leucine zipper kinase                    | 1.00 | 0.04 | 0.74 | 0.62 |
| Hepatocyte growth factor receptor                           | 0.92 | 0.65 | 0.72 | 1.22 |
| MAP kinase-activated protein kinase 2                       | 0.86 | 0.97 | 0.70 | 1.40 |
| MAP kinase-interacting serine/threonine-protein kinase MNK1 | 1.00 | 0.05 | 0.86 | 0.79 |
| Ribosomal protein S6 kinase alpha 5                         | 1.00 | 0.07 | 0.77 | 1.03 |
| Myosin light chain kinase, smooth muscle                    | 0.99 | 0.18 | 0.82 | 0.97 |
| NIMA (never in mitosis gene a)-related kinase 2             | 1.00 | 0.03 | 0.66 | 0.76 |
| putative serine-threonine protein kinase                    | 1.00 | 0.03 | 0.66 | 0.75 |
| NIMA (never in mitosis gene a)-related kinase 7             | 1.00 | 0.04 | 0.60 | 0.89 |
| Neurotrophic tyrosine kinase, receptor, type 1 isoform 1    | 1.00 | 0.09 | 0.65 | 1.03 |
| Nerve growth factor receptor Trk-A                          | 1.00 | 0.04 | 0.73 | 0.92 |
| p21-activated kinase 6                                      | 1.00 | 0.04 | 0.86 | 0.67 |
| Serine/threonine-protein kinase PAK7                        | 1.00 | 0.04 | 0.59 | 1.03 |
| Platelet-derived growth factor receptor alpha               | 0.75 | 1.03 | 0.55 | 1.38 |
| Platelet-derived growth factor receptor beta                | 0.59 | 1.25 | 0.44 | 1.46 |
| Phosphorylase kinase gamma subunit 1                        | 1.00 | 0.06 | 0.86 | 0.99 |
| Phosphorylase kinase gamma subunit 2                        | 1.00 | 0.06 | 0.87 | 0.97 |
| Serine/threonine-protein kinase PIM1                        | 0.81 | 1.06 | 0.62 | 1.49 |
| Serine/threonine-protein kinase PIM2                        | 0.98 | 0.37 | 0.85 | 0.96 |
| Serine/threonine-protein kinase PIM3                        | 1.00 | 0.05 | 0.83 | 0.93 |
| cAMP-dependent protein kinase alpha-catalytic subunit       | 0.87 | 0.93 | 0.75 | 1.28 |
| cAMP-dependent protein kinase beta-1 catalytic subunit      | 0.92 | 0.77 | 0.75 | 1.37 |
| cAMP-dependent protein kinase, gamma catalytic subunit      | 0.92 | 0.80 | 0.77 | 1.32 |
| Protein kinase C alpha                                      | 0.78 | 1.14 | 0.67 | 1.39 |
| Protein kinase C beta                                       | 0.87 | 0.73 | 0.73 | 1.06 |
| Protein kinase C delta                                      | 0.96 | 0.46 | 0.80 | 0.98 |
| Protein kinase C gamma                                      | 0.97 | 0.40 | 0.81 | 0.94 |
| Protein kinase C eta                                        | 0.98 | 0.36 | 0.82 | 0.98 |
| Protein kinase C iota                                       | 1.00 | 0.14 | 0.87 | 0.83 |



|                                               |      |      |      |      |
|-----------------------------------------------|------|------|------|------|
| Protein kinase C theta                        | 0.85 | 0.83 | 0.70 | 1.18 |
| Protein kinase C zeta                         | 0.97 | 0.41 | 0.83 | 1.04 |
| Protein kinase C mu                           | 0.97 | 0.40 | 0.74 | 1.32 |
| Protein kinase C nu                           | 1.00 | 0.14 | 0.81 | 0.97 |
| Protein kinase N2                             | 1.00 | 0.05 | 0.78 | 0.92 |
| Serine/threonine-protein kinase PLK1          | 0.92 | 0.74 | 0.72 | 1.36 |
| Serine/threonine-protein kinase RAF           | 0.82 | 1.07 | 0.67 | 1.43 |
| Tyrosine-protein kinase receptor RET          | 1.00 | 0.05 | 0.67 | 0.86 |
| Serine/threonine-protein kinase Sgk1          | 1.00 | 0.07 | 0.66 | 1.04 |
| Tyrosine-protein kinase SRC                   | 0.57 | 1.38 | 0.50 | 1.48 |
| Serine/threonine-protein kinase SRPK1         | 1.00 | 0.03 | 0.72 | 0.90 |
| Serine/threonine-protein kinase MST1          | 1.00 | 0.04 | 0.82 | 0.78 |
| Tyrosine-protein kinase SYK                   | 0.92 | 0.53 | 0.72 | 1.02 |
| Tyrosine-protein kinase TIE-2                 | 0.83 | 0.66 | 0.69 | 0.90 |
| Vascular endothelial growth factor receptor 1 | 0.76 | 0.72 | 0.61 | 0.90 |
| Vascular endothelial growth factor receptor 2 | 1.00 | 1.00 | 0.25 | 1.53 |
| Vascular endothelial growth factor receptor 3 | 1.00 | 0.05 | 0.82 | 0.81 |
| Serine/threonine-protein kinase WEE1          | 0.92 | 0.34 | 0.82 | 0.53 |
| Tyrosine-protein kinase ZAP-70                | 1.00 | 0.03 | 0.84 | 1.11 |
| MAP kinase p38 alpha                          | 1.00 | 1.00 | 0.24 | 1.89 |
| MAP kinase p38 beta                           | 0.75 | 1.20 | 0.57 | 1.58 |
| MAP kinase p38 delta                          | 0.84 | 0.95 | 0.64 | 1.45 |
| MAP kinase p38 gamma                          | 0.84 | 1.03 | 0.69 | 1.43 |

<sup>a</sup>: Coefficient of determination of calculation

<sup>b</sup>: RMSE in calculation

<sup>c</sup>: Coefficient of determination of prediction

<sup>d</sup>: RMSE in prediction

**Table S3** Redundancy and deviation of multiple experimental data in KinaseSARfari data

| Preferred name                                               | Ki/Kd         |              | IC <sub>50</sub> |              | % inhibition/% activity |              | ΔG            |              |
|--------------------------------------------------------------|---------------|--------------|------------------|--------------|-------------------------|--------------|---------------|--------------|
|                                                              | No. of groups | σ (kcal/mol) | No. of groups    | σ (kcal/mol) | No. of groups           | σ (kcal/mol) | No. of groups | σ (kcal/mol) |
| Tyrosine-protein kinase ABL1                                 | 173           | 0.406        | 42               | 0.587        | 2                       | 0.015        | 247           | 0.749        |
| Tyrosine-protein kinase ABL2                                 | 22            | 0.262        | 0                | ND           | 0                       | ND           | 29            | 0.514        |
| Serine/threonine-protein kinase AKT                          | 0             | ND           | 135              | 0.694        | 12                      | 0.132        | 210           | 0.986        |
| Serine/threonine-protein kinase AKT2                         | 0             | ND           | 9                | 0.191        | 12                      | 0.15         | 51            | 0.761        |
| Serine/threonine-protein kinase AKT3                         | 0             | ND           | 7                | 0.145        | 0                       | ND           | 12            | 1.012        |
| ALK tyrosine kinase receptor                                 | 0             | ND           | 8                | 0.586        | 0                       | ND           | 20            | 0.968        |
| Serine/threonine-protein kinase Aurora-A                     | 11            | 0.268        | 33               | 0.573        | 4                       | 0.003        | 74            | 0.841        |
| Serine/threonine-protein kinase Aurora-B                     | 10            | 0.448        | 19               | 0.524        | 12                      | 0.081        | 71            | 0.699        |
| Serine/threonine-protein kinase Aurora-C                     | 16            | 0.068        | 0                | ND           | 12                      | 0.095        | 38            | 0.566        |
| Serine/threonine-protein kinase B-raf                        | 15            | 0.255        | 19               | 0.429        | 0                       | ND           | 56            | 0.687        |
| Cell division cycle 7-related protein kinase                 | 0             | ND           | 11               | 0.151        | 0                       | ND           | 38            | 0.24         |
| Cyclin-dependent kinase 1                                    | 4             | 0.084        | 244              | 0.272        | 36                      | 0.164        | 315           | 0.394        |
| Cyclin-dependent kinase 2                                    | 11            | 0.187        | 370              | 0.287        | 69                      | 0.106        | 502           | 0.536        |
| Cyclin-dependent kinase 4                                    | 2             | 0.098        | 193              | 0.28         | 38                      | 0.134        | 266           | 0.503        |
| Cyclin-dependent kinase 5                                    | 8             | 0.221        | 42               | 0.131        | 16                      | 0.154        | 74            | 0.782        |
| Cyclin-dependent kinase 9                                    | 0             | ND           | 17               | 0.436        | 0                       | ND           | 22            | 0.756        |
| Inhibitor of nuclear factor kappa B kinase alpha subunit     | 0             | ND           | 27               | 0.134        | 0                       | ND           | 31            | 0.719        |
| Dual-specificity protein kinase CLK4                         | 12            | 0.18         | 10               | 0.12         | 0                       | ND           | 27            | 0.371        |
| Macrophage colony stimulating factor receptor                | 0             | ND           | 61               | 0.824        | 17                      | 0.404        | 105           | 1.277        |
| Tyrosine-protein kinase CSK                                  | 8             | 0.099        | 0                | ND           | 29                      | 0.161        | 46            | 0.951        |
| Serine/threonine-protein kinase Chk1                         | 0             | ND           | 30               | 0.269        | 18                      | 0.202        | 141           | 1.094        |
| Serine/threonine-protein kinase Chk2                         | 0             | ND           | 14               | 0.55         | 10                      | 0.096        | 29            | 1.154        |
| Dual-specificity tyrosine-phosphorylation regulated kinase 2 | 0             | ND           | 0                | ND           | 10                      | 0.108        | 11            | 0.748        |
| Dual-specificity tyrosine-phosphorylation regulated kinase 3 | 0             | ND           | 0                | ND           | 10                      | 0.151        | 12            | 0.39         |

|                                                            |    |       |     |       |    |       |      |       |
|------------------------------------------------------------|----|-------|-----|-------|----|-------|------|-------|
| Epidermal growth factor receptor erbB1                     | 74 | 0.379 | 845 | 0.354 | 72 | 0.247 | 1377 | 0.708 |
| MAP kinase ERK2                                            | 0  | ND    | 9   | 0.707 | 16 | 0.049 | 30   | 0.783 |
| MAP kinase ERK1                                            | 0  | ND    | 9   | 0.246 | 14 | 0.123 | 30   | 0.894 |
| Mitogen-activated protein kinase 15                        | 0  | ND    | 0   | ND    | 10 | 0.136 | 13   | 0.463 |
| Focal adhesion kinase 1                                    | 6  | 0.053 | 17  | 0.249 | 0  | ND    | 24   | 0.33  |
| Fibroblast growth factor receptor 1                        | 10 | 0.199 | 90  | 0.243 | 2  | 0.036 | 125  | 0.434 |
| Fibroblast growth factor receptor 2                        | 8  | 0.122 | 4   | 0.323 | 0  | ND    | 18   | 0.511 |
| Fibroblast growth factor receptor 3                        | 18 | 0.22  | 2   | 0.685 | 0  | ND    | 22   | 0.651 |
| Fibroblast growth factor receptor 4                        | 0  | ND    | 0   | ND    | 0  | ND    | 2    | 0.746 |
| Tyrosine-protein kinase receptor FLT3                      | 79 | 0.253 | 21  | 0.301 | 2  | 0.067 | 123  | 0.568 |
| Glycogen synthase kinase-3 alpha                           | 13 | 0.246 | 13  | 0.741 | 0  | ND    | 32   | 0.819 |
| Glycogen synthase kinase-3 alpha                           | 0  | ND    | 12  | 0.395 | 8  | 0.084 | 32   | 0.747 |
| Glycogen synthase kinase-3 beta                            | 5  | 0.111 | 166 | 0.25  | 26 | 0.081 | 297  | 0.696 |
| Tyrosine-protein kinase HCK                                | 9  | 0.249 | 0   | ND    | 0  | ND    | 14   | 0.831 |
| Receptor protein-tyrosine kinase erbB-2                    | 6  | 0.389 | 142 | 0.386 | 38 | 0.146 | 205  | 0.569 |
| Homeodomain-interacting protein kinase 2                   | 0  | ND    | 0   | ND    | 10 | 0.133 | 10   | 0.83  |
| Homeodomain-interacting protein kinase 3                   | 0  | ND    | 0   | ND    | 10 | 0.074 | 6    | 0.429 |
| Insulin-like growth factor I receptor                      | 0  | ND    | 116 | 0.481 | 2  | 0.078 | 134  | 0.701 |
| Inhibitor of nuclear factor kappa B kinase beta subunit    | 0  | ND    | 56  | 0.353 | 10 | 0.015 | 70   | 0.623 |
| Insulin receptor                                           | 8  | 0.146 | 7   | 0.145 | 6  | 0.034 | 30   | 0.538 |
| Interleukin-1 receptor-associated kinase 4                 | 0  | ND    | 0   | ND    | 0  | ND    | 0    | ND    |
| Tyrosine-protein kinase ITK/TSK                            | 0  | ND    | 122 | 0.782 | 0  | ND    | 134  | 1.051 |
| c-Jun N-terminal kinase 1                                  | 6  | 0.102 | 32  | 0.15  | 14 | 0.045 | 72   | 0.767 |
| c-Jun N-terminal kinase 2                                  | 2  | 0.069 | 27  | 0.382 | 12 | 0.07  | 56   | 0.776 |
| c-Jun N-terminal kinase 3                                  | 11 | 0.135 | 25  | 0.131 | 16 | 0.097 | 67   | 0.851 |
| Stem cell growth factor receptor                           | 73 | 0.532 | 175 | 0.109 | 2  | 0.033 | 274  | 0.442 |
| Tyrosine-protein kinase LCK                                | 29 | 0.169 | 224 | 0.947 | 2  | 0.071 | 331  | 1.131 |
| LIM domain kinase 2 isoform 2b                             | 0  | ND    | 0   | ND    | 0  | ND    | 2    | 0.692 |
| Tyrosine-protein kinase Lyn                                | 12 | 0.19  | 20  | 2.475 | 0  | ND    | 50   | 1.965 |
| MAP/microtubule affinity-regulating kinase 3               | 3  | 0.092 | 0   | ND    | 8  | 0.099 | 13   | 0.477 |
| Dual specificity mitogen-activated protein kinase kinase 1 | 0  | ND    | 72  | 0.429 | 10 | 0.106 | 99   | 0.71  |

|                                                             |    |       |     |       |    |       |     |       |
|-------------------------------------------------------------|----|-------|-----|-------|----|-------|-----|-------|
| Maternal embryonic leucine zipper kinase                    | 0  | ND    | 0   | ND    | 10 | 0.153 | 13  | 0.816 |
| Hepatocyte growth factor receptor                           | 0  | ND    | 49  | 0.269 | 2  | 0.063 | 64  | 0.426 |
| MAP kinase-activated protein kinase 2                       | 4  | 0.262 | 29  | 0.446 | 16 | 0.104 | 45  | 0.715 |
| MAP kinase-interacting serine/threonine-protein kinase MNK1 | 0  | ND    | 0   | ND    | 10 | 0.044 | 11  | 0.997 |
| Ribosomal protein S6 kinase alpha 5                         | 13 | 0.132 | 0   | ND    | 10 | 0.052 | 24  | 0.503 |
| Myosin light chain kinase, smooth muscle                    | 7  | 0.235 | 7   | 0.463 | 10 | 0.082 | 35  | 0.797 |
| NIMA (never in mitosis gene a)-related kinase 2             | 8  | 0.199 | 0   | ND    | 10 | 0.017 | 16  | 0.41  |
| Putative serine-threonine protein kinase                    | 0  | ND    | 0   | ND    | 8  | 0.039 | 6   | 0.774 |
| NIMA (never in mitosis gene a)-related kinase 7             | 0  | ND    | 0   | ND    | 10 | 0.019 | 8   | 0.343 |
| Neurotrophic tyrosine kinase, receptor, type 1 isoform 1    | 9  | 0.149 | 2   | 0.1   | 0  | ND    | 32  | 2.268 |
| Nerve growth factor receptor Trk-A                          | 2  | 0.053 | 0   | ND    | 8  | 0.114 | 16  | 0.765 |
| p21-activated kinase 6                                      | 0  | ND    | 0   | ND    | 8  | 0.053 | 10  | 0.567 |
| Serine/threonine-protein kinase PAK7                        | 2  | 0.2   | 0   | ND    | 10 | 0.093 | 12  | 0.338 |
| Platelet-derived growth factor receptor alpha               | 0  | ND    | 31  | 0.253 | 0  | ND    | 43  | 0.599 |
| Platelet-derived growth factor receptor beta                | 14 | 0.17  | 120 | 0.443 | 2  | 0.024 | 171 | 0.608 |
| Phosphorylase kinase gamma subunit 1                        | 10 | 0.353 | 0   | ND    | 12 | 0.05  | 31  | 0.523 |
| Phosphorylase kinase gamma subunit 2                        | 6  | 0.301 | 0   | ND    | 12 | 0.05  | 27  | 0.518 |
| Serine/threonine-protein kinase PIM1                        | 11 | 0.251 | 26  | 0.81  | 74 | 0.183 | 161 | 0.978 |
| Serine/threonine-protein kinase PIM2                        | 6  | 0.253 | 15  | 0.691 | 36 | 0.086 | 63  | 0.534 |
| Serine/threonine-protein kinase PIM3                        | 0  | ND    | 0   | ND    | 38 | 0.203 | 57  | 0.936 |
| cAMP-dependent protein kinase alpha-catalytic subunit       | 0  | ND    | 23  | 0.407 | 14 | 0.158 | 54  | 0.902 |
| cAMP-dependent protein kinase beta-1 catalytic subunit      | 0  | ND    | 18  | 0.44  | 2  | 0.066 | 27  | 0.847 |
| cAMP-dependent protein kinase, gamma catalytic subunit      | 0  | ND    | 18  | 0.44  | 2  | 0.066 | 26  | 0.743 |
| Protein kinase C alpha                                      | 42 | 0.352 | 56  | 0.488 | 22 | 0.128 | 175 | 0.781 |
| Protein kinase C beta                                       | 27 | 0.471 | 47  | 0.637 | 2  | 0.055 | 135 | 0.701 |
| Protein kinase C delta                                      | 19 | 0.512 | 44  | 0.548 | 2  | 0.055 | 80  | 0.75  |
| Protein kinase C gamma                                      | 23 | 0.26  | 38  | 0.55  | 2  | 0.055 | 73  | 0.682 |
| Protein kinase C eta                                        | 10 | 0.809 | 32  | 0.591 | 2  | 0.055 | 59  | 0.961 |

|                                               |      |       |      |       |      |       |       |       |
|-----------------------------------------------|------|-------|------|-------|------|-------|-------|-------|
| Protein kinase C iota                         | 0    | ND    | 20   | 0.765 | 24   | 0.154 | 70    | 0.634 |
| Protein kinase C theta                        | 2    | 0.023 | 35   | 0.589 | 2    | 0.055 | 90    | 0.662 |
| Protein kinase C zeta                         | 0    | ND    | 20   | 0.708 | 12   | 0.023 | 50    | 1.205 |
| Protein kinase C mu                           | 2    | 0.023 | 24   | 0.613 | 12   | 0.214 | 61    | 1.018 |
| Protein kinase C nu                           | 2    | 0.023 | 19   | 0.714 | 2    | 0.055 | 35    | 0.983 |
| Protein kinase N2                             | 0    | ND    | 3    | 0.336 | 8    | 0.156 | 10    | 0.581 |
| Serine/threonine-protein kinase PLK1          | 0    | ND    | 12   | 0.313 | 10   | 0.058 | 24    | 0.83  |
| Serine/threonine-protein kinase RAF           | 3    | 0.748 | 59   | 0.365 | 4    | 0.023 | 76    | 0.788 |
| Tyrosine-protein kinase receptor RET          | 27   | 0.142 | 0    | ND    | 0    | ND    | 34    | 0.496 |
| Serine/threonine-protein kinase Sgk1          | 0    | ND    | 6    | 0.719 | 12   | 0.037 | 19    | 0.868 |
| Tyrosine-protein kinase SRC                   | 78   | 0.095 | 146  | 0.472 | 4    | 0.033 | 336   | 1.038 |
| Serine/threonine-protein kinase SRPK1         | 0    | ND    | 0    | ND    | 12   | 0.17  | 15    | 0.689 |
| Serine/threonine-protein kinase MST1          | 0    | ND    | 0    | ND    | 10   | 0.199 | 19    | 0.511 |
| Tyrosine-protein kinase SYK                   | 4    | 0.271 | 20   | 0.371 | 0    | ND    | 63    | 0.657 |
| Tyrosine-protein kinase TIE-2                 | 7    | 0.145 | 140  | 0.108 | 24   | 0.097 | 216   | 0.356 |
| Vascular endothelial growth factor receptor 1 | 0    | ND    | 53   | 0.297 | 2    | 0.004 | 73    | 0.72  |
| Vascular endothelial growth factor receptor 2 | 28   | 0.685 | 986  | 0.22  | 42   | 0.058 | 1273  | 0.51  |
| Vascular endothelial growth factor receptor 3 | 14   | 0.194 | 7    | 0.46  | 2    | 0.03  | 34    | 0.858 |
| Serine/threonine-protein kinase WEE1          | 0    | ND    | 400  | 0.012 | 0    | ND    | 400   | 0.016 |
| Tyrosine-protein kinase ZAP-70                | 13   | 0.104 | 0    | ND    | 0    | ND    | 28    | 0.322 |
| MAP kinase p38 alpha                          | 71   | 0.347 | 338  | 0.276 | 16   | 0.1   | 763   | 0.621 |
| MAP kinase p38 beta                           | 14   | 0.281 | 27   | 0.312 | 12   | 0.102 | 70    | 0.7   |
| MAP kinase p38 delta                          | 5    | 0.349 | 17   | 0.301 | 12   | 0.066 | 40    | 1.008 |
| MAP kinase p38 gamma                          | 13   | 0.413 | 18   | 0.302 | 14   | 0.05  | 48    | 0.996 |
| Average                                       | 10.8 | 0.243 | 59.8 | 0.439 | 10.9 | 0.093 | 106.9 | 0.729 |

“ND” means that there is no redundant data.

**Table S4.** Average correlation values ( $R^2/Q^2$ ) between the experimental data and the calculated data and RMSE obtained by the docking-score QSAR model with various  $N$  ( $W=20$  and  $\lambda=0.002$ ) for all 107 proteins.

| $N\sigma$    | Total no. of compounds <sup>a</sup> | Regression         |                               | 4-fold cross validation |                               |
|--------------|-------------------------------------|--------------------|-------------------------------|-------------------------|-------------------------------|
|              |                                     | $R^2$ <sup>a</sup> | RMSEC (kcal/mol) <sup>b</sup> | $Q^2$ <sup>c</sup>      | RMSEP (kcal/mol) <sup>d</sup> |
| 0.2 $\sigma$ | 35050                               | 0.912              | 0.471                         | 0.675                   | 1.152                         |
| 0.4 $\sigma$ | 35736                               | 0.911              | 0.475                         | 0.675                   | 1.155                         |
| 0.5 $\sigma$ | 36249                               | 0.910              | 0.480                         | 0.675                   | 1.155                         |
| 0.6 $\sigma$ | 36804                               | 0.909              | 0.484                         | 0.676                   | 1.155                         |
| 0.8 $\sigma$ | 38124                               | 0.908              | 0.489                         | 0.685                   | 1.134                         |
| $\sigma$     | 44063                               | 0.882              | 0.645                         | 0.644                   | 1.206                         |
| 2 $\sigma$   | 45549                               | 0.874              | 0.697                         | 0.631                   | 1.231                         |
| 3 $\sigma$   | 45650                               | 0.871              | 0.704                         | 0.630                   | 1.235                         |

<sup>a</sup>: The standard deviation of the whole observed data (kcal/mol)

<sup>a</sup>: Coefficient of determination of calculation

<sup>b</sup>: RMSE in calculation

<sup>c</sup>: Coefficient of determination of prediction

<sup>d</sup>: RMSE in prediction

**Table S5.**  $Q^2$  values for selected kinases. The docking-score QSAR method (4-fold cross validation tests) and the myPresto/sievgene docking program with using the default parameters give the  $Q^2$  and RMSEP values.

| Preferred name                                           | Kinase ID  | PDB ID | QSAR model         |                               | Docking score      |                               |
|----------------------------------------------------------|------------|--------|--------------------|-------------------------------|--------------------|-------------------------------|
|                                                          |            |        | $Q^2$ <sup>a</sup> | RMSEP (kcal/mol) <sup>b</sup> | $Q^2$ <sup>a</sup> | RMSEP (kcal/mol) <sup>b</sup> |
| Tyrosine-protein kinase ABL1                             | hABL1_1950 | 3QRI   | 0.54               | 1.11                          | 0.03               | 1.42                          |
| Tyrosine-protein kinase ABL2                             | hABL2_1942 | 3HMI   | 0.74               | 0.91                          | 0.15               | 1.26                          |
| Serine/threonine-protein kinase AKT                      | hAKT1_2014 | 3MV5   | 0.66               | 1.76                          | 0.19               | 1.73                          |
| Serine/threonine-protein kinase AKT2                     | hAKT2_2120 | -      | 0.84               | 1.19                          | -                  | -                             |
| Serine/threonine-protein kinase AKT3                     | hAKT3_2128 | -      | 0.87               | 0.78                          | -                  | -                             |
| ALK tyrosine kinase receptor                             | hALK_949   | 5FTO   | 0.62               | 1.57                          | 0.14               | 2.06                          |
| Serine/threonine-protein kinase Aurora-A                 | hAURa_2362 | 4BYI   | 0.62               | 1.05                          | 0.02               | 1.23                          |
| Serine/threonine-protein kinase Aurora-B                 | hAURb_2346 | -      | 0.77               | 0.91                          | -                  | -                             |
| Serine/threonine-protein kinase Aurora-C                 | hAURc_2382 | -      | 0.76               | 1.06                          | -                  | -                             |
| Serine/threonine-protein kinase B-raf                    | hBRAF_1421 | 5FD2   | 0.85               | 0.86                          | 0.06               | 1.26                          |
| Cell division cycle 7-related protein kinase             | hCDC7_4    | 4F99   | 0.76               | 0.46                          | 0.02               | 1.37                          |
| Cyclin-dependent kinase 1                                | hCDK1_416  | -      | 0.42               | 1.47                          |                    |                               |
| Cyclin-dependent kinase 2                                | hCDK2_583  | 1DM2   | 0.26               | 1.86                          | 0.04               | 1.63                          |
| Cyclin-dependent kinase 4                                | hCDK4_340  | -      | 0.54               | 1.17                          | -                  | -                             |
| Cyclin-dependent kinase 5                                | hCDK5_607  | -      | 0.47               | 1.46                          | -                  | -                             |
| Cyclin-dependent kinase 9                                | hCDK9_246  | -      | 0.81               | 0.74                          | -                  | -                             |
| Inhibitor of nuclear factor kappa B kinase alpha subunit | hCHUK_513  | -      | 0.71               | 0.68                          | -                  | -                             |
| Dual specificity protein kinase CLK4                     | hCLK4_128  | -      | 0.74               | 0.73                          | -                  | -                             |
| Macrophage colony stimulating factor receptor            | hCSF1R_55  | -      | 0.68               | 1.10                          | -                  | -                             |
| Tyrosine-protein kinase CSK                              | hCSK_2470  | 1BYG   | 0.79               | 0.86                          | 0.24               | 1.76                          |
| Serine/threonine-protein kinase Chk1                     | hChk1_1758 | 2E9P   | 0.57               | 1.68                          | 0.19               | 1.50                          |
| Serine/threonine-protein kinase Chk2                     | hChk2_1009 | 2W7X   | 0.79               | 1.22                          | 0.15               | 1.99                          |

|                                                              |            |      |      |      |      |      |
|--------------------------------------------------------------|------------|------|------|------|------|------|
| Dual-specificity tyrosine-phosphorylation regulated kinase 2 | hDYRK2_173 | 4AZF | 0.65 | 1.03 | 0.03 | 2.01 |
| Dual-specificity tyrosine-phosphorylation regulated kinase 3 | hDYRK3_167 | -    | 0.82 | 0.64 | -    | -    |

<sup>a</sup>: Coefficient of determination of prediction

<sup>b</sup>: RMSE in prediction



**Figure S1**  $W$  dependence of  $Q^2$  and RMSEP. Blue and orange lines represent  $\lambda=0.002$  and  $0.005$ , respectively.

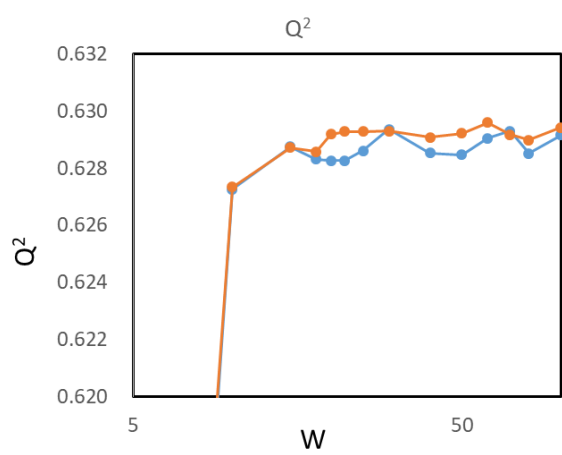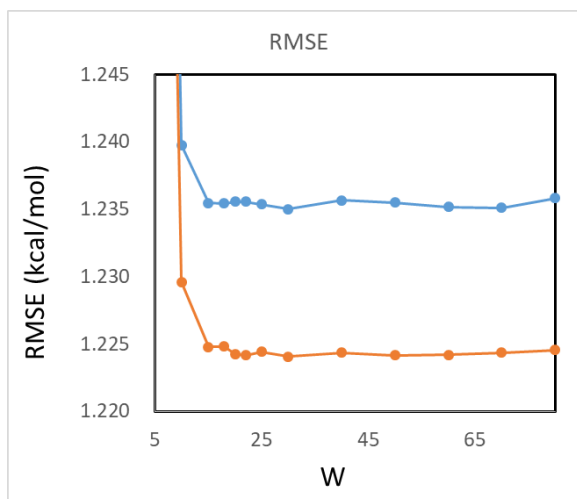

**Figure S2** Correlation between the calculated and experimental  $\Delta G$  values. The 4-fold cross validation results by the docking score QSAR method ( $\lambda=0.005$ ,  $W=20$ ,  $N=0.8$ ) are in the left column. The naive docking results are in the right column (shown as „\_by\_docking“). The orange dotted lines are the  $y=x$  lines.

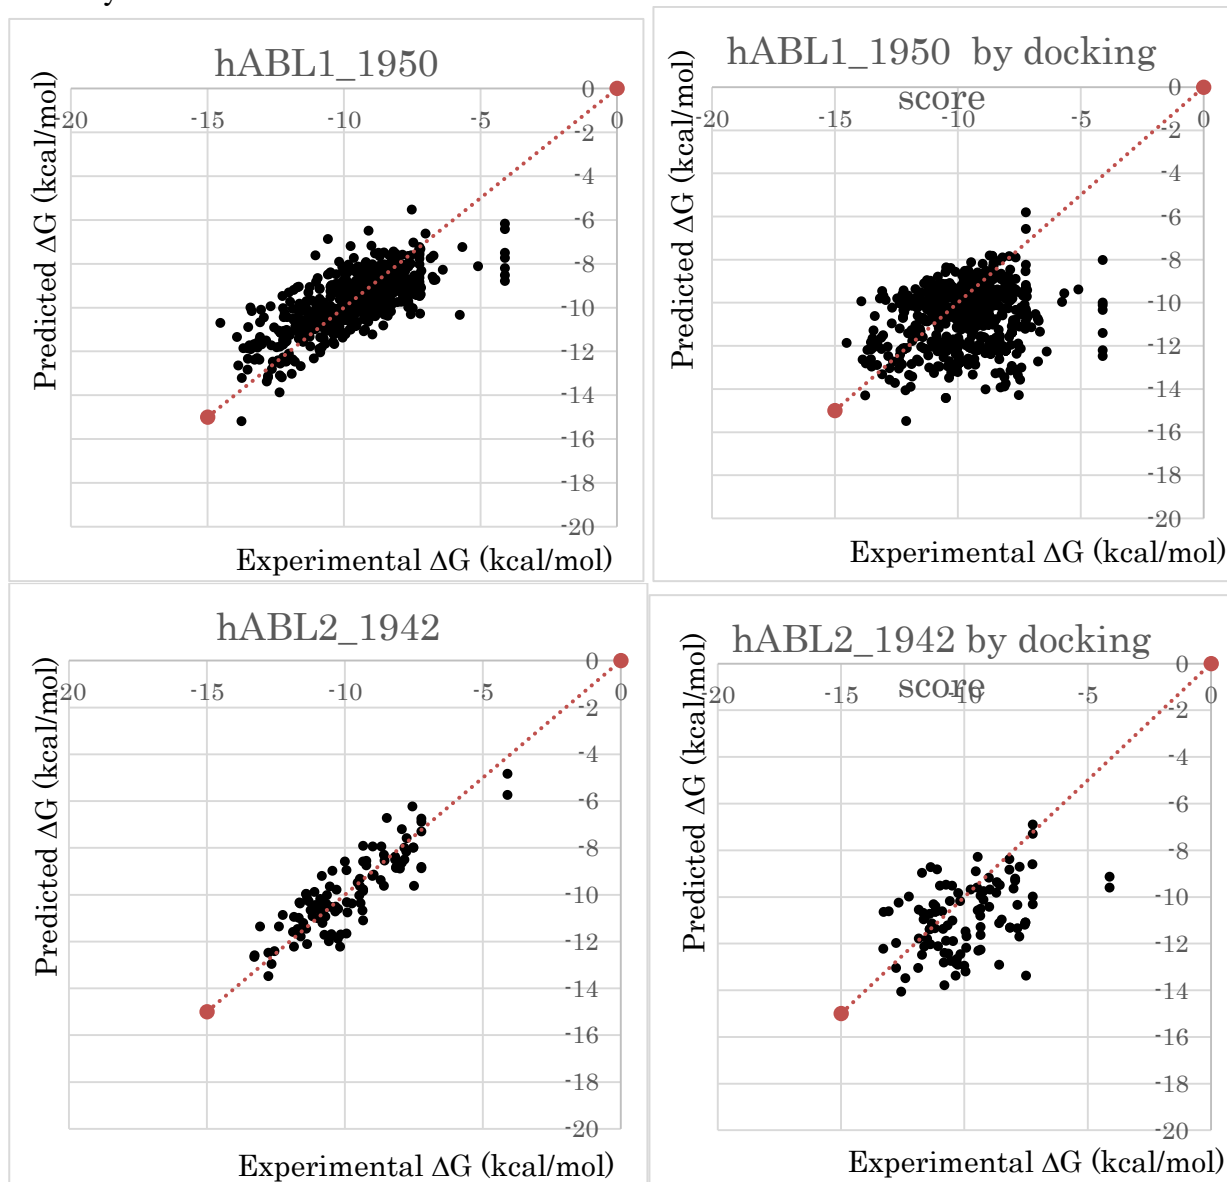

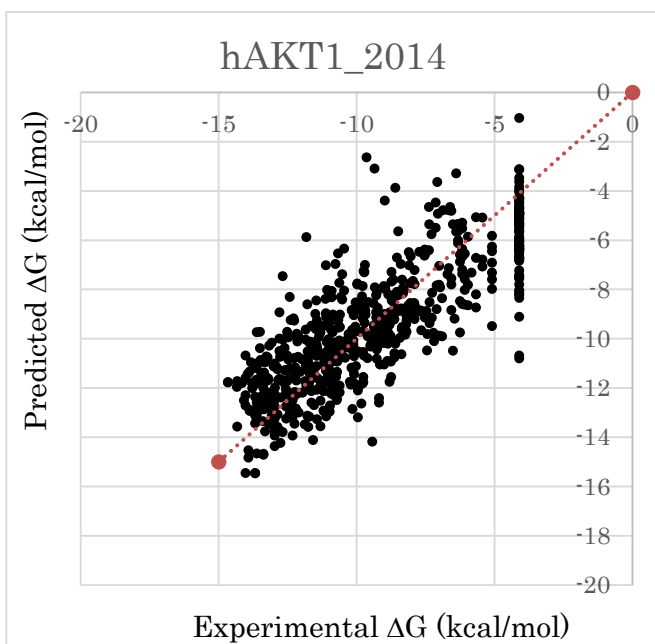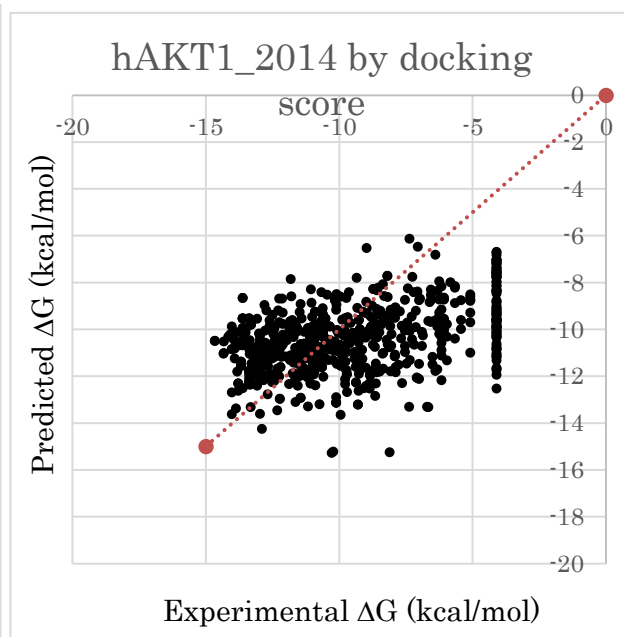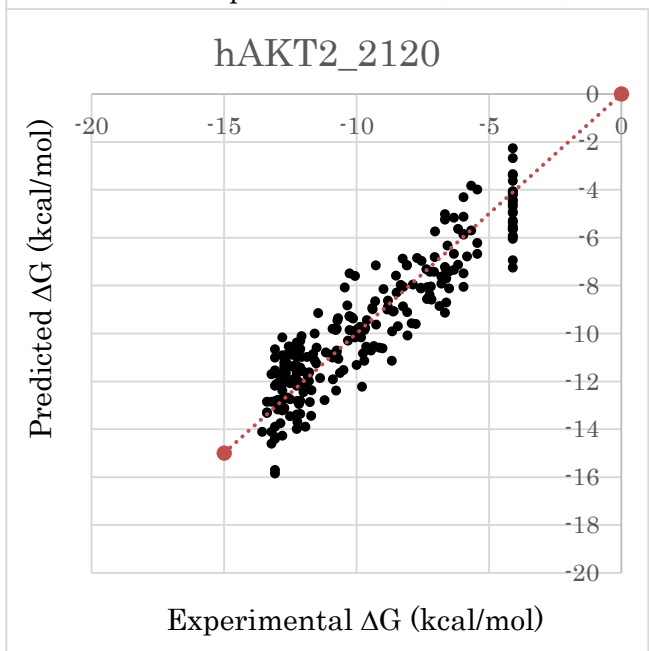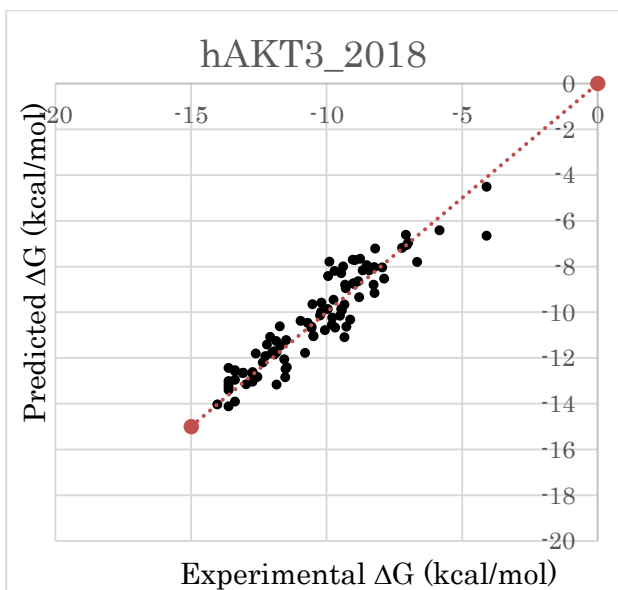

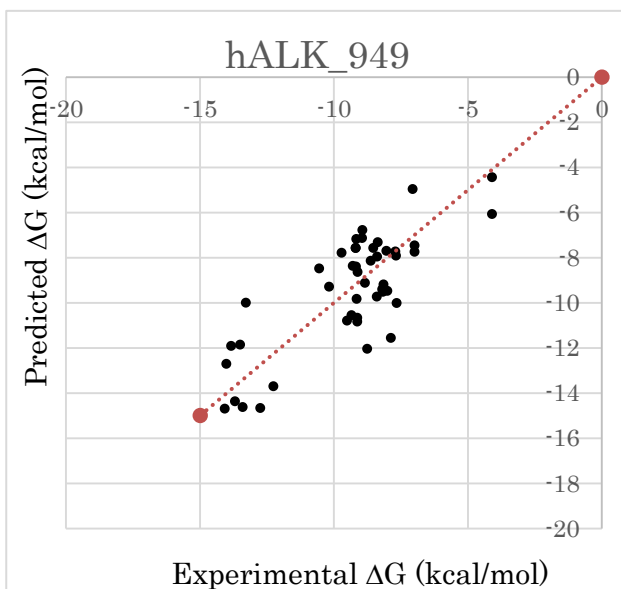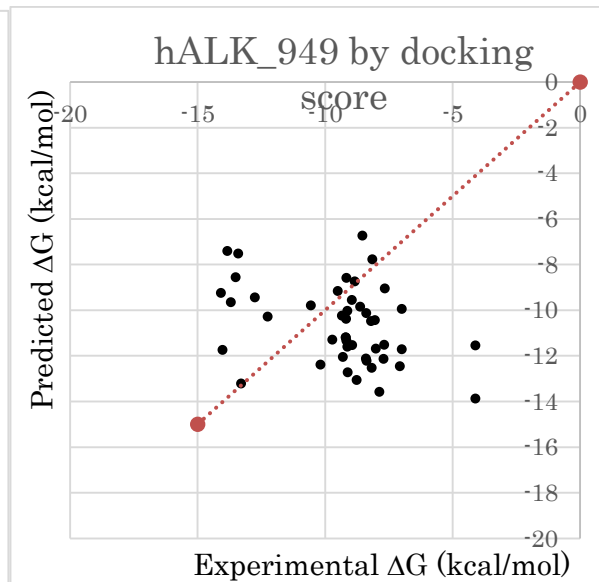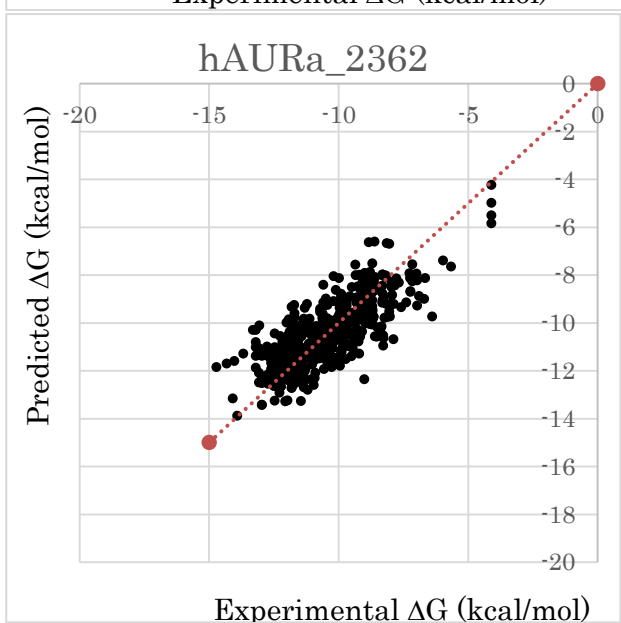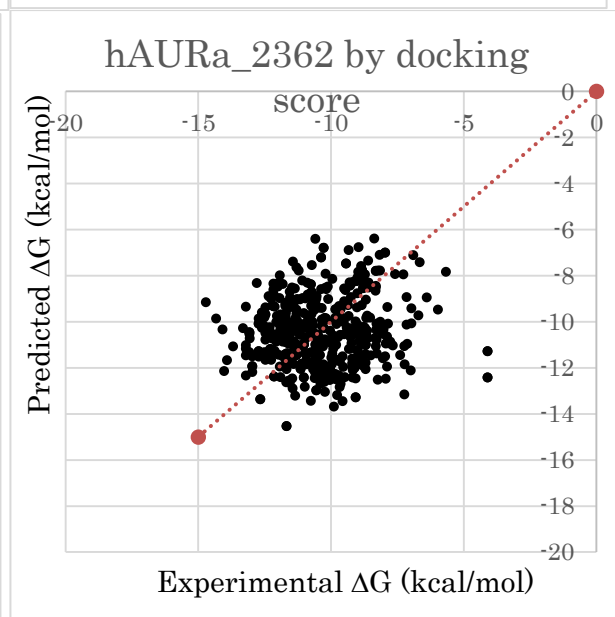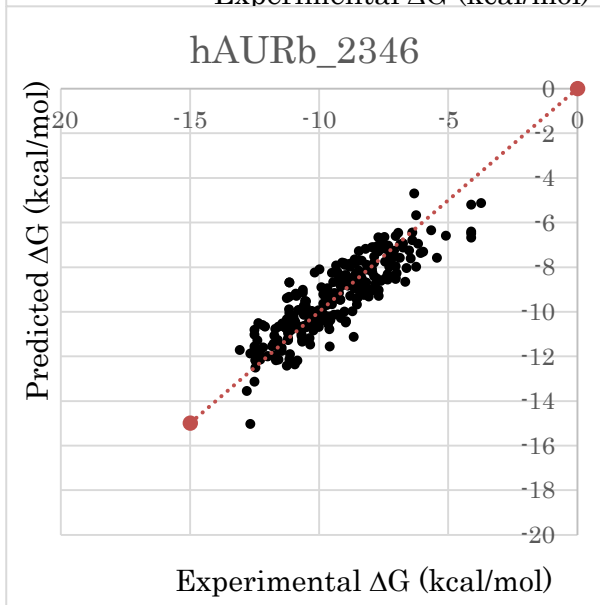

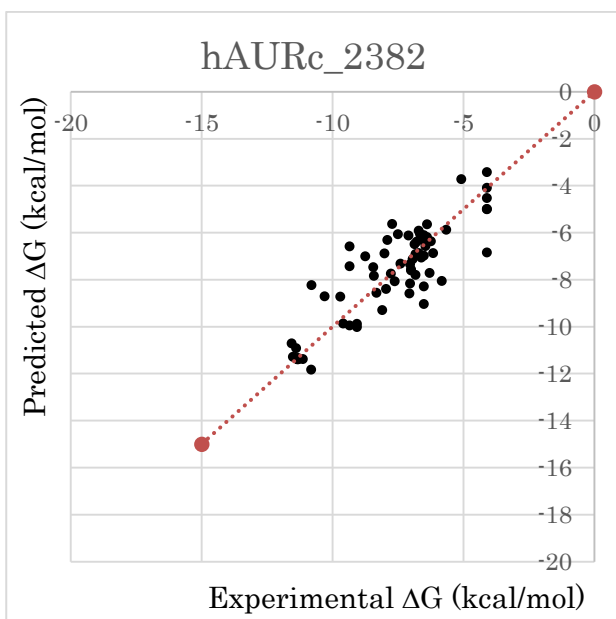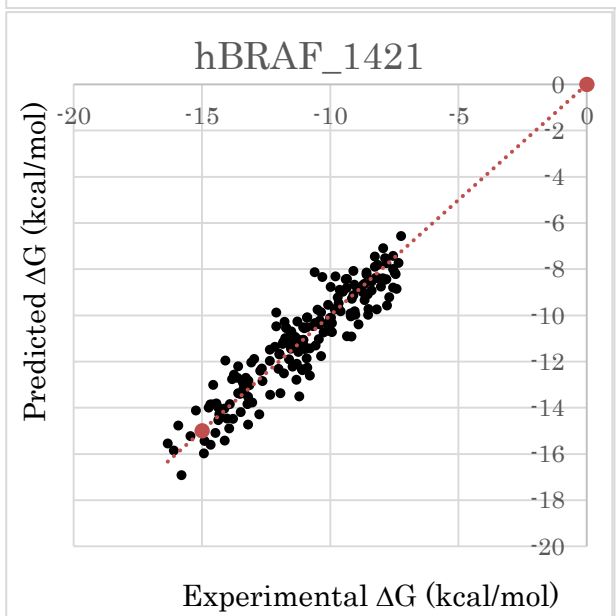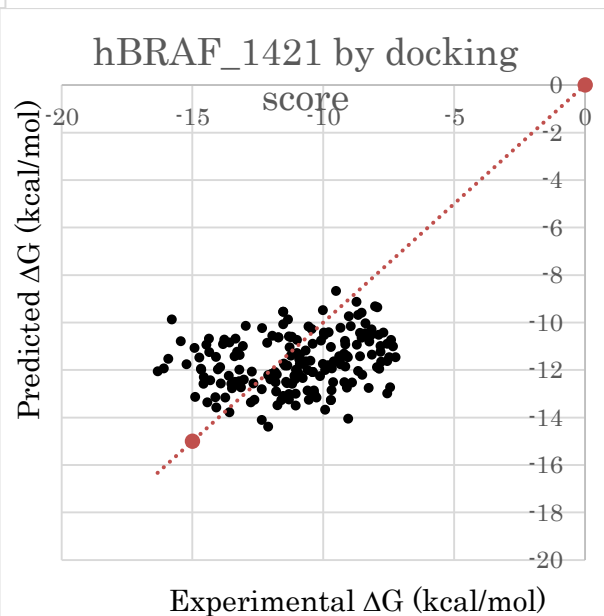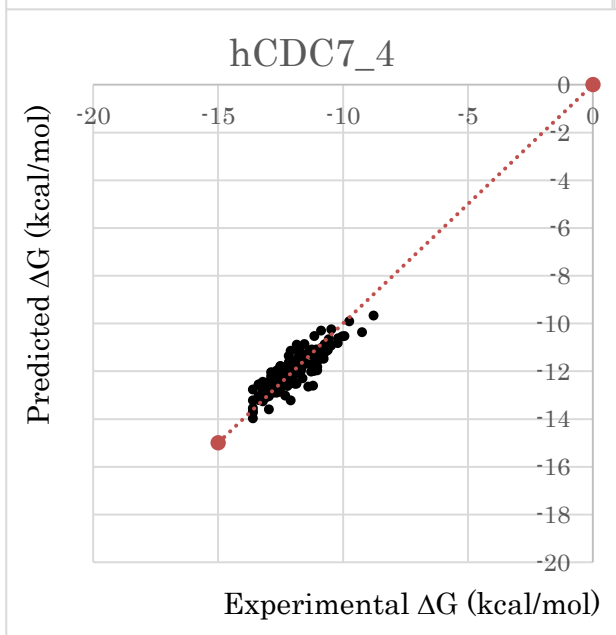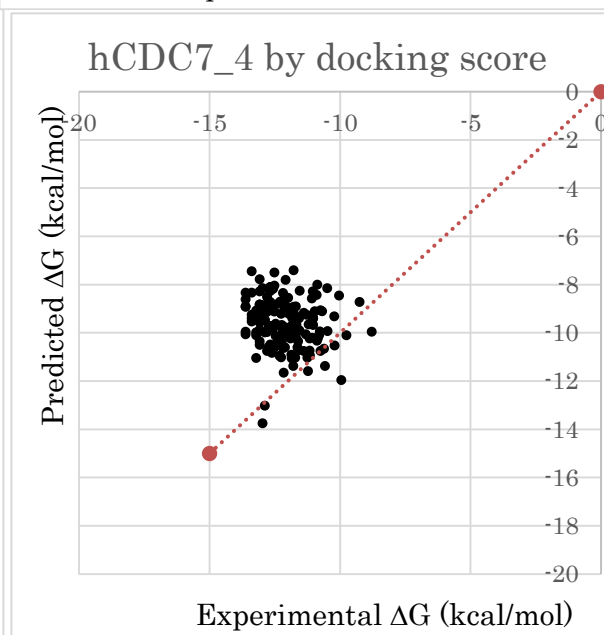

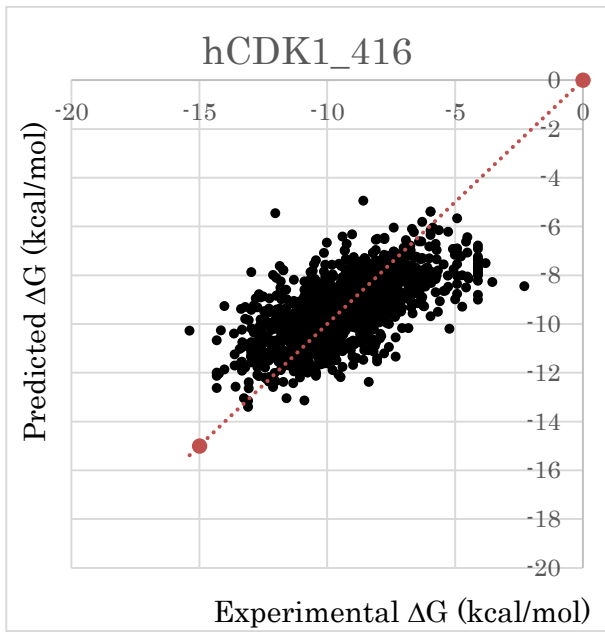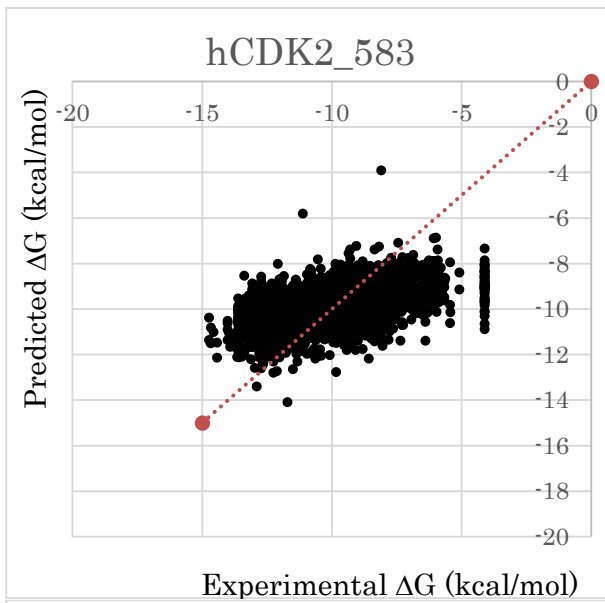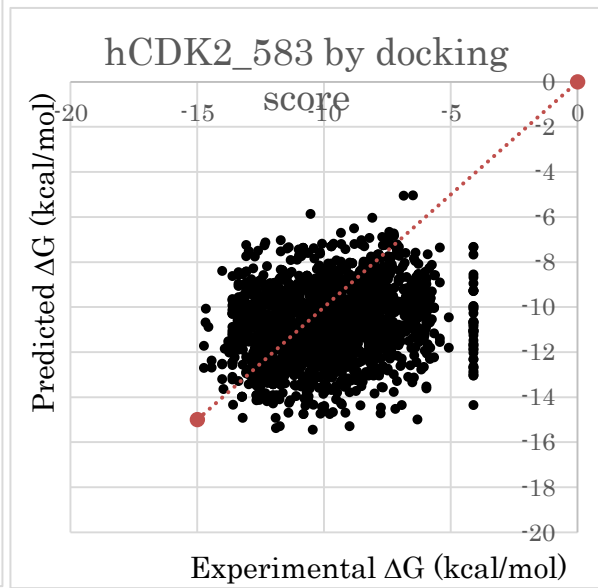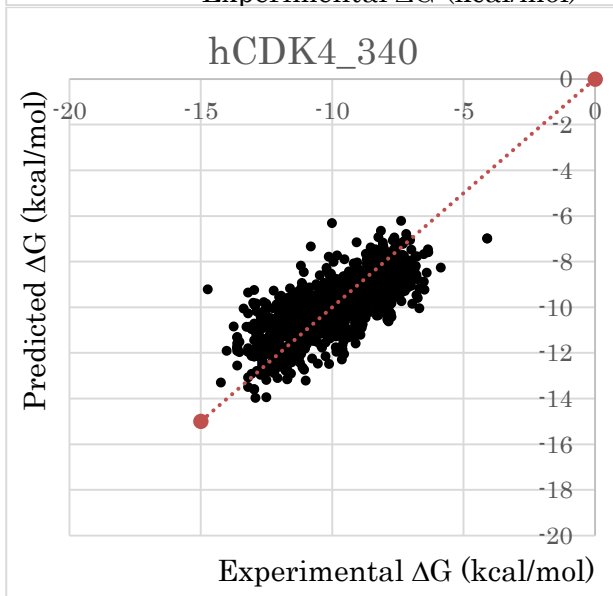

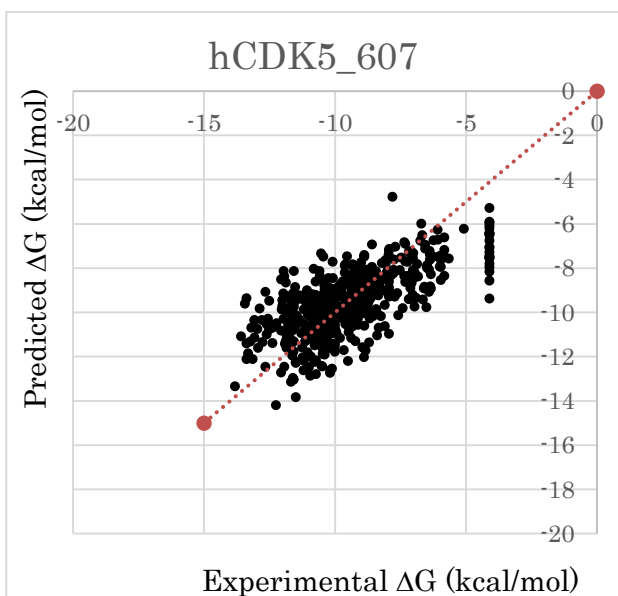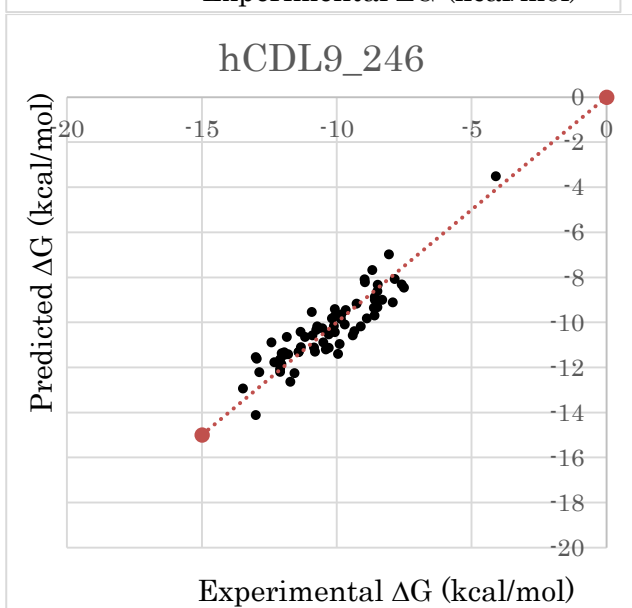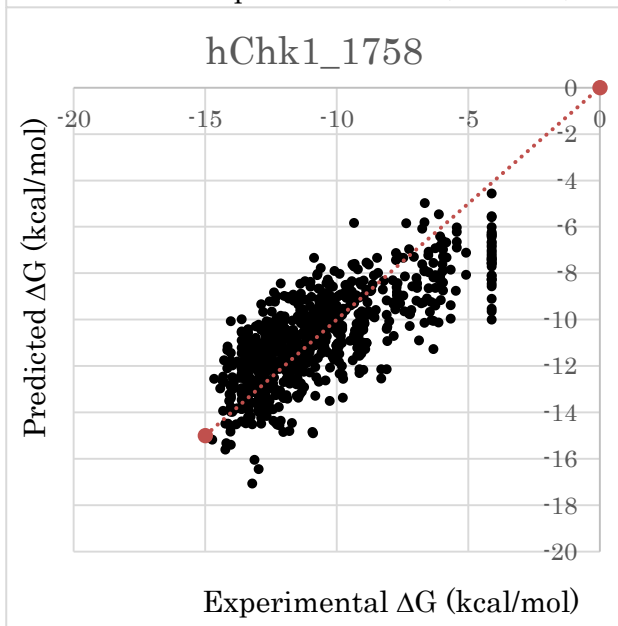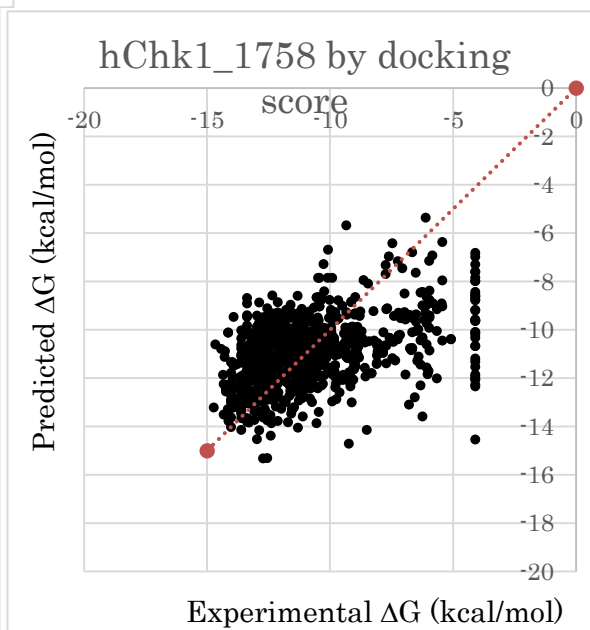

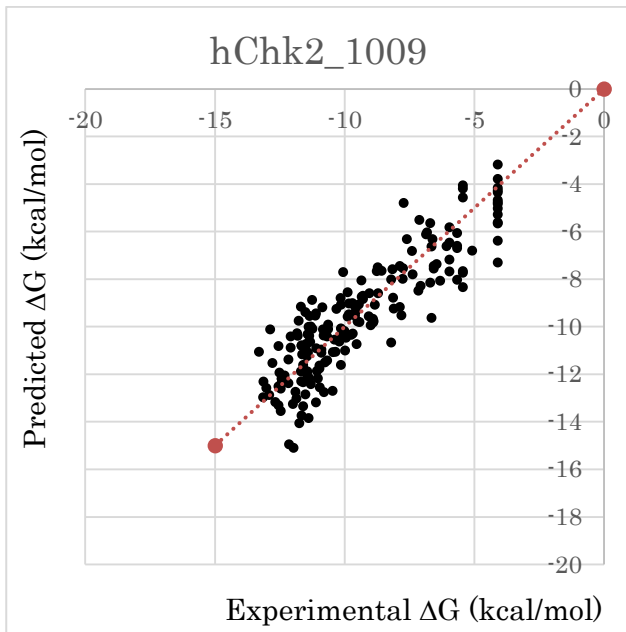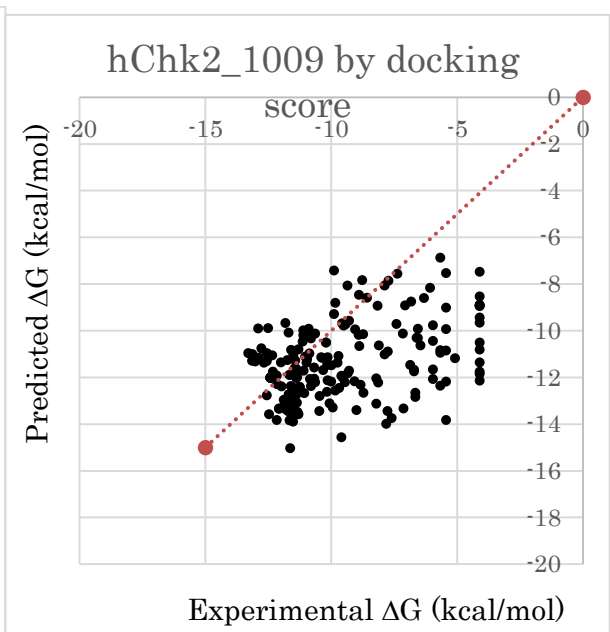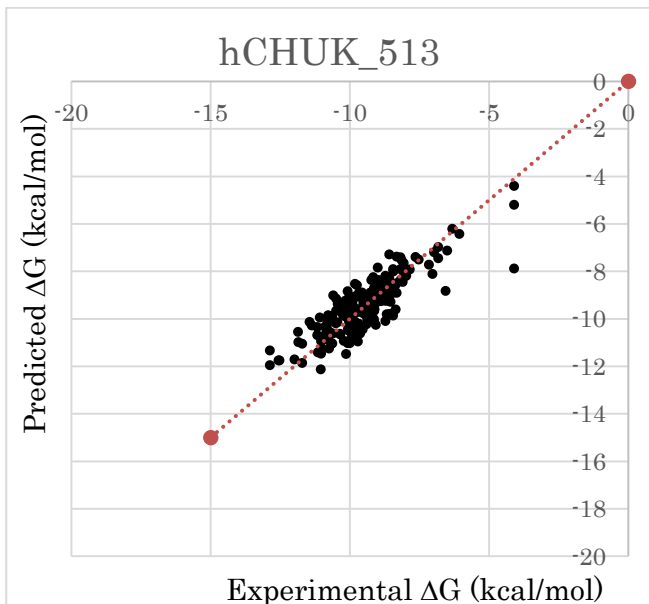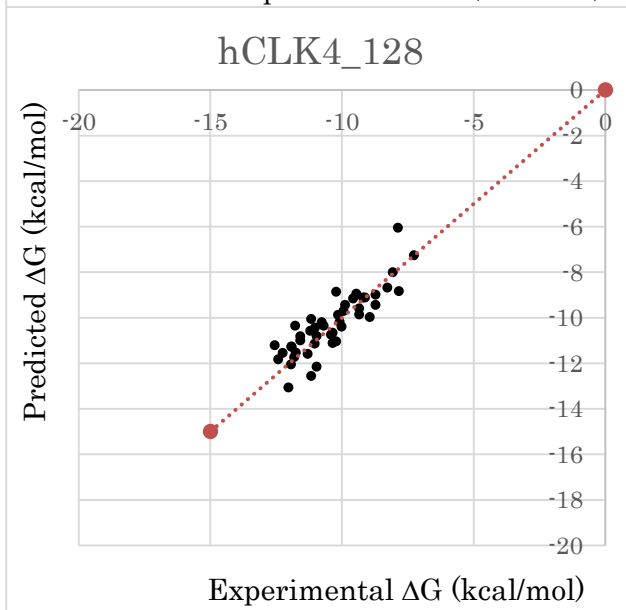



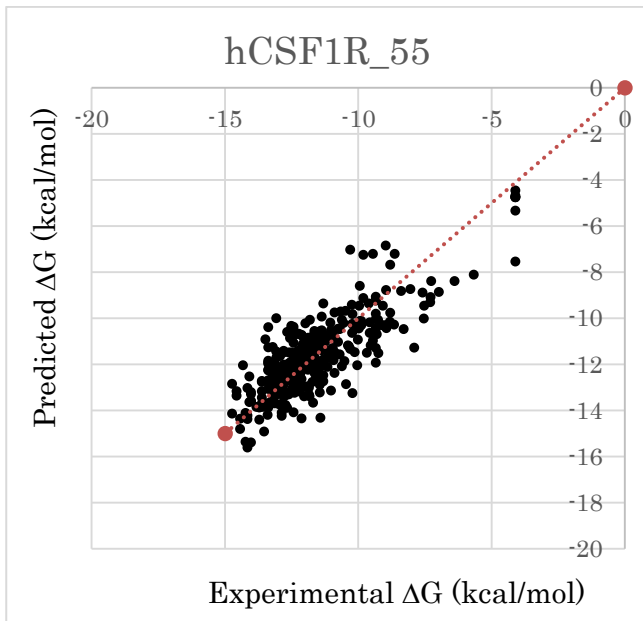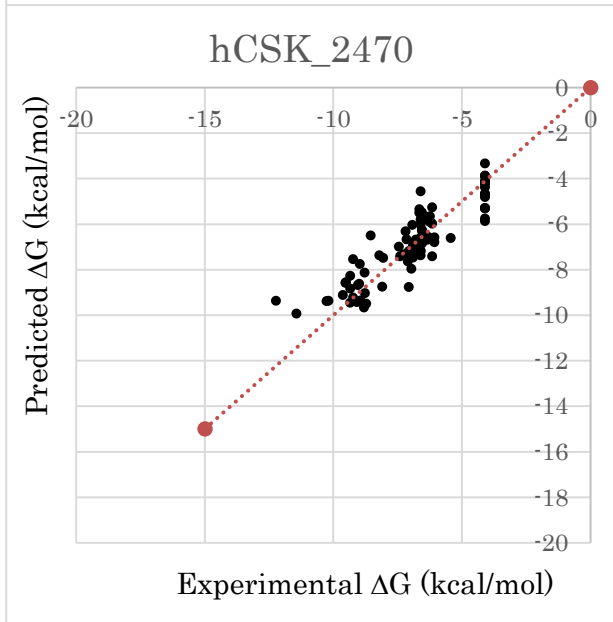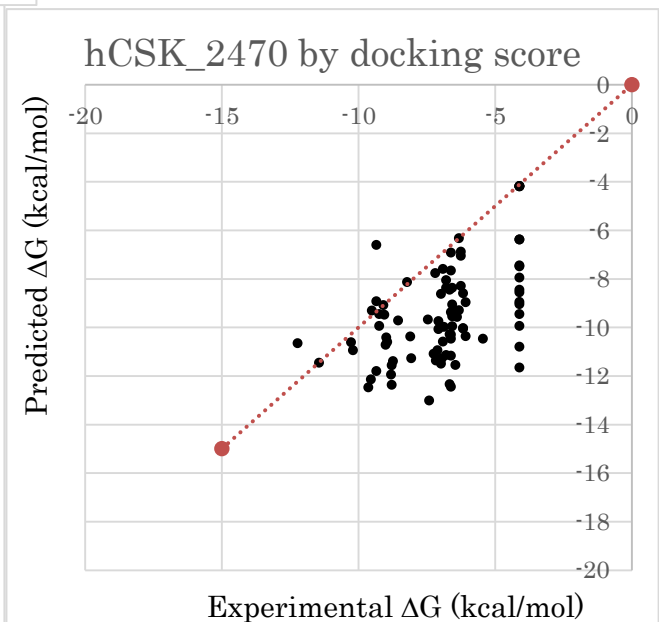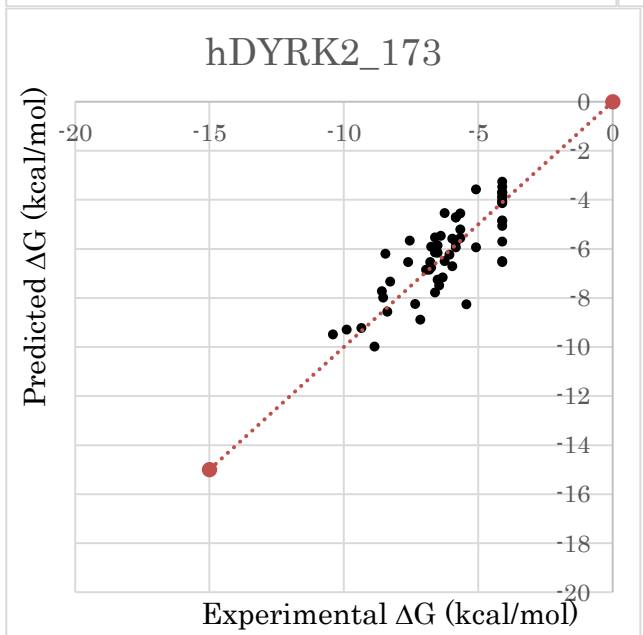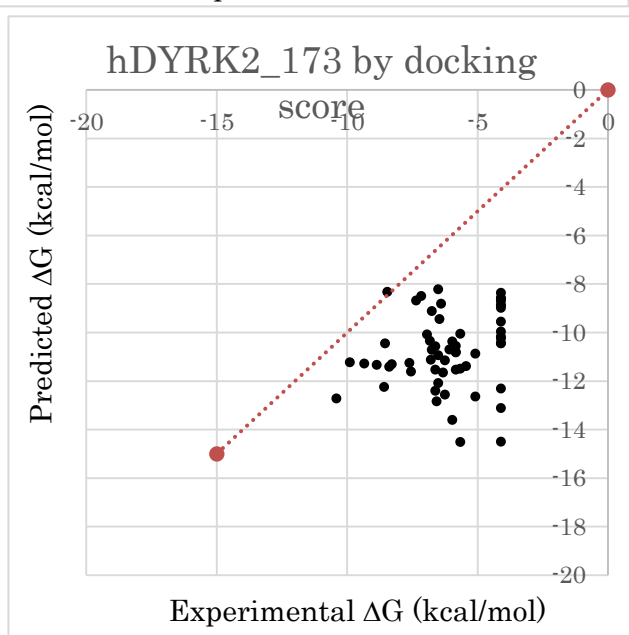

### hDYRK3\_167

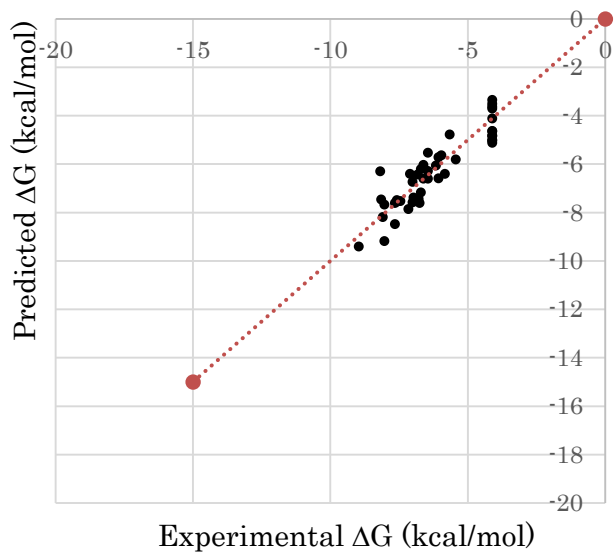



**Figure S3** Correlation between the calculated and experimental  $\Delta G$  values. The LOO cross validation results by the docking score QSAR method ( $\lambda=0.002$ ,  $W=20$ ,  $N=0.5$ ) are in the left column. The naive docking results are in the right column. The blue dotted lines are the  $y=x$  lines.

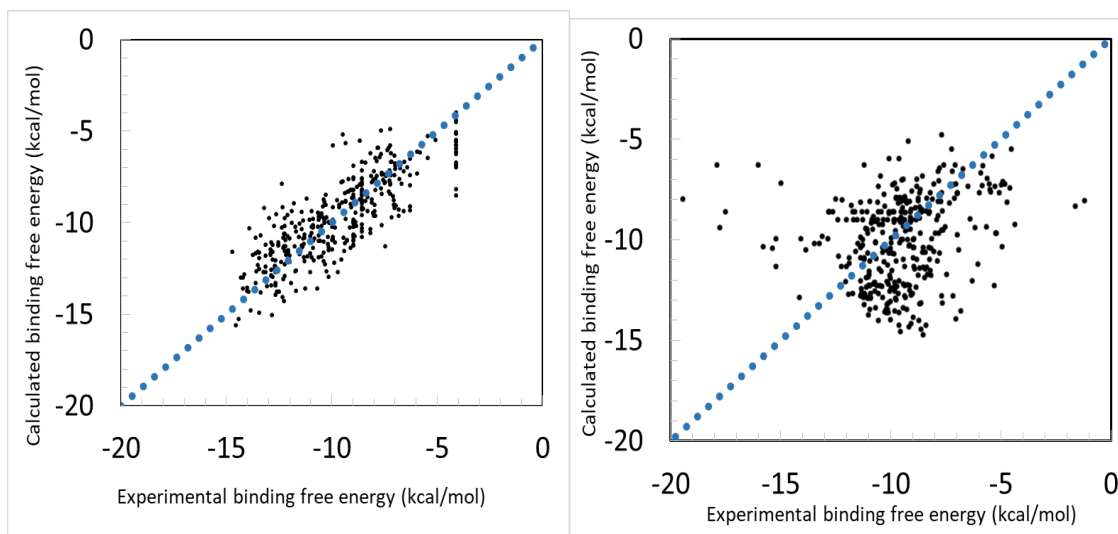

MMP3

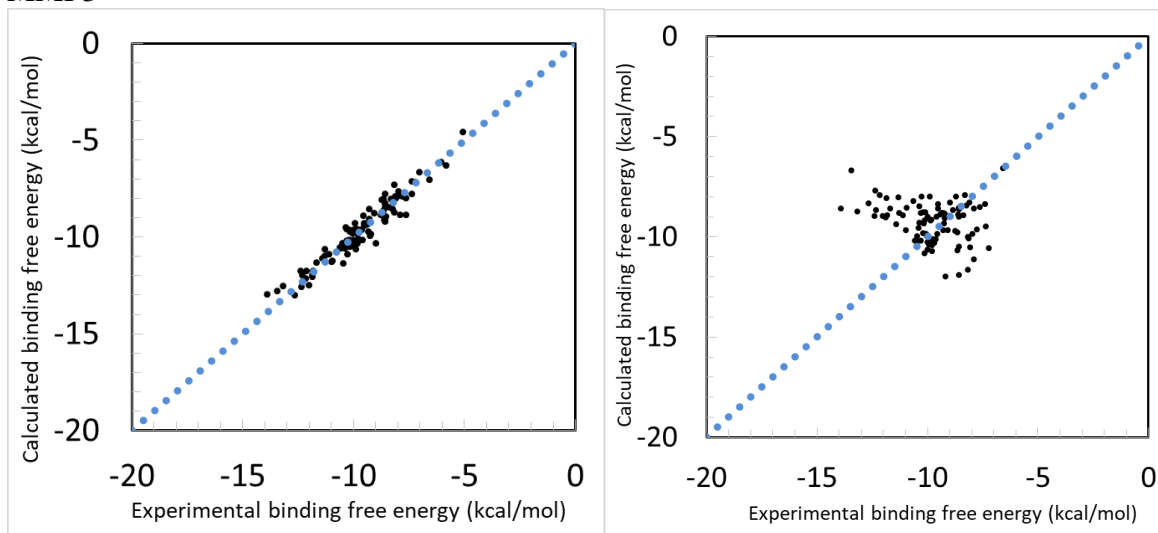

MMP7

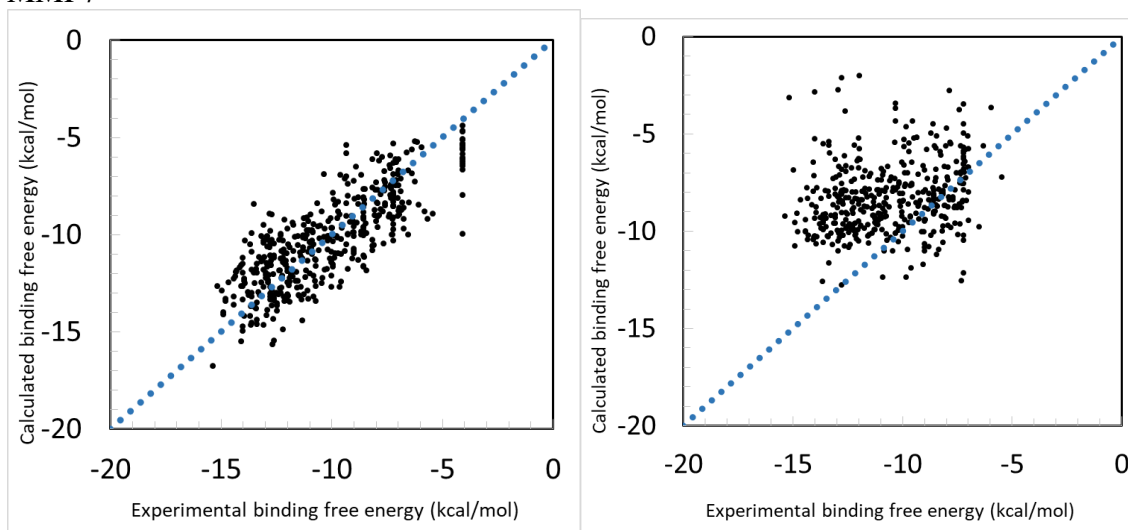

MMP9

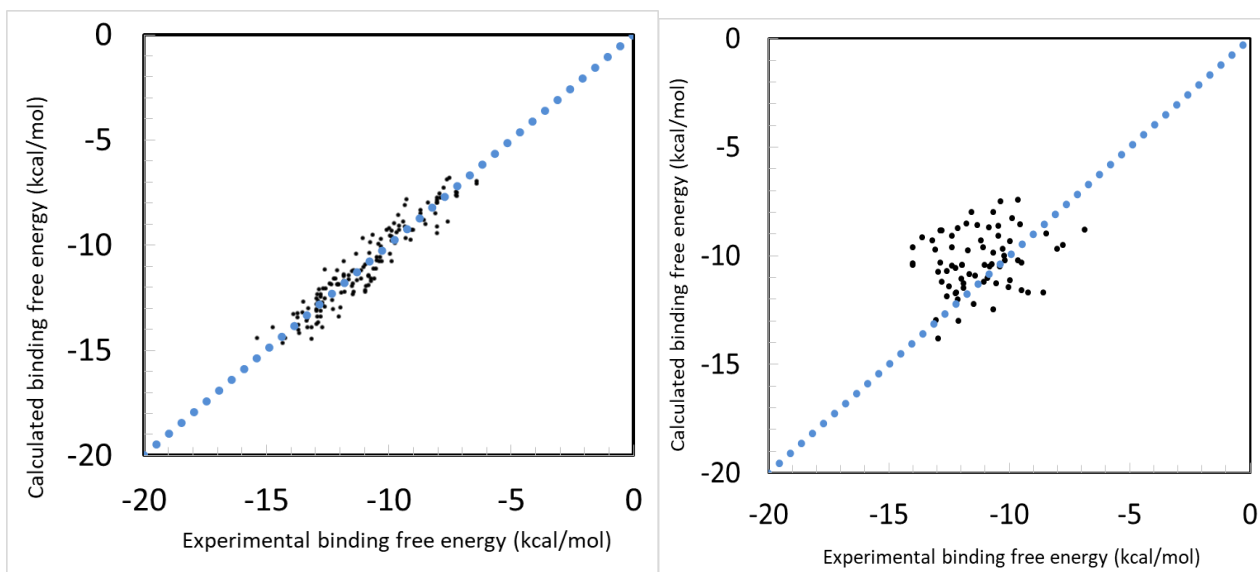

MMP13
